# Supplementary material for: 1,1′-Sulfinyldipyridinium bis (hydrogen sulfate) ionic liquid: synthesis and application in the temperature-influenced synthesis of novel pyranopyrimidinediones and pyranopyrimidinetriones
Source: Royal Society of Chemistry journal article supplement (doi:10.1039/c4ra10410b), 2014-01-01

## *Supporting Information*

# **1, 1'-sulfinyldipyridinium bis (hydrogen sulfate) ionic liquid: synthesis and its application towards temperature influenced synthesis of novel pyranopyrimidinediones and pyranopyrimidinetriones**

**Jayavant D. Patil and Dattaprasad M. Pore,\***

*<sup>a</sup>Department of Chemistry, Shivaji University, Kolhapur- 416004, India*

*\*E-mail: p\_dattaprasad@rediffmail.com*

| <b>Table of content:</b>                                                                                                                           | <b>Page No.</b> |
|----------------------------------------------------------------------------------------------------------------------------------------------------|-----------------|
| <b>A General Information</b>                                                                                                                       | <b>S-1</b>      |
| <b>B Typical procedure for preparation of ionic liquid</b>                                                                                         | <b>S-2</b>      |
| <b>C Typical procedure for synthesis of Pyranopyrimidinedione and<br/>Pyranopyrimidinetrione</b>                                                   | <b>S-2</b>      |
| <b>D Reusability of ionic liquids [(Py)<sub>2</sub>SO][HSO<sub>4</sub>]<sub>2</sub></b>                                                            | <b>S-2</b>      |
| <b>E Infrared Spectra of Uracil, Pyranopyrimidinedione and<br/>Pyranopyrimidinetrione</b>                                                          | <b>S-3</b>      |
| <b>F <sup>1</sup>H, <sup>13</sup>C and MS (ESI) spectra of ionic liquid</b>                                                                        | <b>S-4</b>      |
| <b>G <sup>1</sup>H NMR, <sup>13</sup>C NMR, IR and MS(EI) spectra of Synthesized<br/>Pyranopyrimidinedione and Pyranopyrimidinetrione products</b> | <b>S-4</b>      |

### **A) General Information**

IR spectra were recorded on a Perkin–Elmer FT-IR 783 spectrophotometer. NMR spectra were recorded on a BrukerAC-300 spectrometer in DMSO-d<sub>6</sub> and CDCl<sub>3</sub> using tetramethylsilane as internal standard. Mass spectra were recorded on a Shimadzu QP2010 GCMS.

## **B) Typical procedure for preparation of ionic liquid:**

### **Step I: Synthesis of ionic liquid [(Py)<sub>2</sub>SO]Cl<sub>2</sub>:**

A three necked flask (100 ml) equipped with a condenser was charged with pyridine (0.79 g, 10mmol) in dry dichloromethane (50 ml). Then under rigorous stirring, 3.65 ml (5mmol) of thionyl chloride was added drop wise over a period of 30 min. After the addition was completed, the reaction was stirred for 12 h at room temperature. The ionic liquid [(Py)<sub>2</sub>SO]Cl<sub>2</sub> was obtained by distillation of dichloromethane. The ionic liquid was washed with dry dichloromethane (3×10 ml) and purified through drying in a vacuum at 80 °C to remove the residual dichloromethane.

### **Step II: Synthesis of ionic liquid [(Py)<sub>2</sub>SO][HSO<sub>4</sub>]<sub>2</sub> :**

A round bottom flask (50 ml) was charged with [(Py)<sub>2</sub>SO]Cl<sub>2</sub> (10 g, 36 mmol), then sulphuric acid (3.53 g, 36 mmol) was added over a period of 5 min at 0-5 °C. Afterward, the reaction mixture was stirred for 12 h at 120 °C to give [(Py)<sub>2</sub>SO] [HSO<sub>4</sub>]<sub>2</sub> in 98% yield.

### **C) a) Typical procedure for synthesis of Pyranopyrimidinedione :**

A mixture of salicylaldehyde (1mmol) and 6-amino uracil (2 mmol) in bronsted acidic ionic liquid [(Py)<sub>2</sub>SO][HSO<sub>4</sub>]<sub>2</sub> (20 mol%) was stirred in ethanol at ambient temperature for the time indicated in Table 3. The progress of the reaction was monitored by TLC. After completion of reaction, the precipitated product was filtered and washed with water and cooled ethanol.

### **b) Typical procedure for synthesis of Pyranopyrimidinetrione:**

A mixture of salicylaldehyde (1 mmol) and uracil (2 mmol) in bronsted acidic ionic liquid [(Py)<sub>2</sub>SO][HSO<sub>4</sub>]<sub>2</sub> (20 mol%) was refluxing in ethanol (5 mL) for 5 h. After completion of the reaction confirmed by TLC, the reaction mixture was cooled to room temperature. Then, the precipitated product was filtered and washed with water (10 mL) and methanol (5 mL) to afford the pure product.

## **D) Reusability of [(Py)<sub>2</sub>SO][HSO<sub>4</sub>]<sub>2</sub> ionic liquids as catalyst for synthesis of pyranopyrimidinedione:**

Recycling of catalyst is one of the most significant criteria of green chemical reaction, hence recovery and reuse of the ionic liquid catalyst was examined in the reaction of salicylaldehyde and 6-amino uracil in ethanol. After completion of reaction, the product was separated by simple filtration. Then ionic liquid was conveniently recovered and reused after heat treatment under vacuum at 70°C for 2 hours. As shown in **table 1**. Ionic liquid

$[(\text{Py})_2\text{SO}][\text{HSO}_4]_2$  was reused at least five times without significant decrease in the reaction yield.

**Table 1.** Reusability of catalyst for synthesis of pyranopyrimidinedione<sup>[a]</sup>

| Run | Cycle | Time (h) | Yield (%) <sup>[b]</sup> |
|-----|-------|----------|--------------------------|
| 1   | 0     | 1        | 96                       |
| 2   | I     | 1        | 93                       |
| 3   | II    | 1        | 90                       |
| 4   | III   | 1        | 89                       |
| 5   | IV    | 1        | 88                       |

<sup>[a]</sup> Salicylaldehyde (1mmol), 6-amino uracil (2-mmol) and 20 mol% catalyst in ethanol at room temperature.

<sup>[b]</sup> Yield refers to pure, isolated product.

### E) Infrared Spectra:

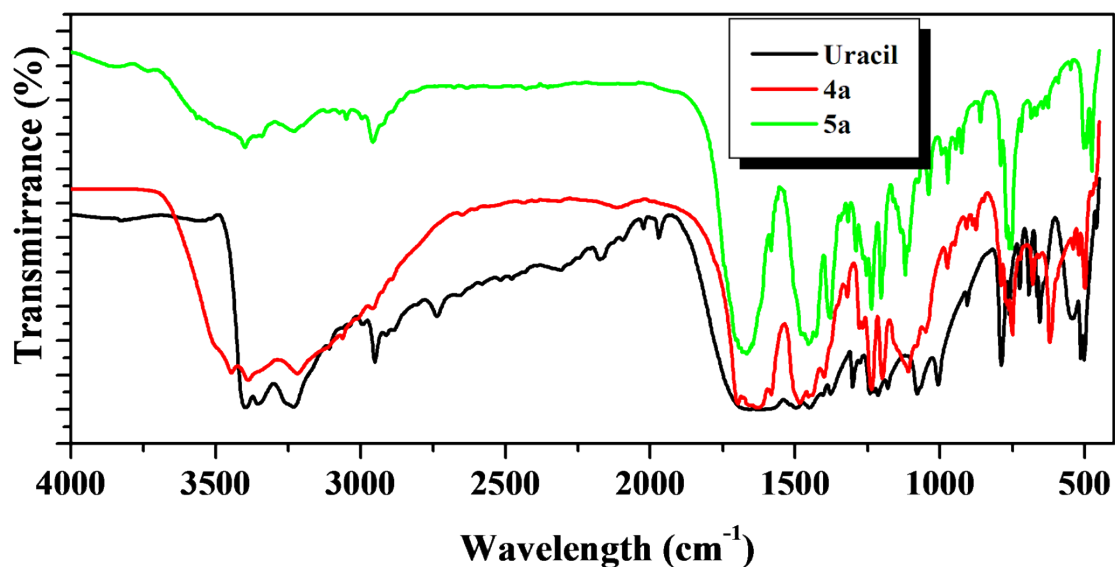

**Fig. 1** IR spectra of uracil, pyranopyrimidinedione (**4a**), pyranopyrimidinetriene (**5a**).

**F) Spectral data of [(Py)<sub>2</sub>SO][HSO<sub>4</sub>]<sub>2</sub> ionic liquid:**

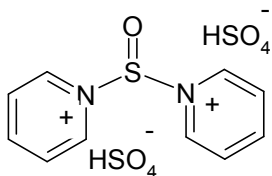

<sup>1</sup>H NMR (DMSO-d<sub>6</sub>, 500 MHz): δ 8.08-8.12 (t, 2H, *J*= 10 Hz), 8.51-8.66 (m, 4H), 8.91-8.93 (d, 2H, *J*= 10 Hz), (DMSO-d<sub>6</sub>, 125 MHz): 127.78, 141.97, 146.98, MS (ESI): 257 m/z and 159 m/z (+ ve mode), 97 m/z (- ve mode).

**G) Spectral data of synthesized Pyranopyrimidinedione compounds:**

**Entry a, Table 3:** 5-(6-amino-1,3-dimethyl-2,4-dioxo-1,2,3,4-tetrahydropyrimidin-5-yl)-1,3-dimethyl-1,5-dihydro-2*H*-chromeno[2,3-*d*]pyrimidine-2,4(3*H*)-dione

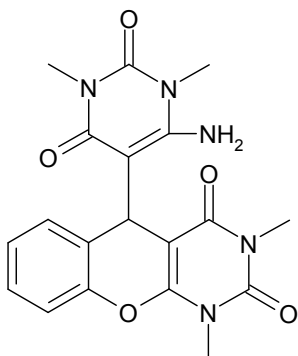

White solid; M.P. 278 °C; IR (KBr): 3445, 3388, 3218, 1695, 1634, 1583, 1484, 1199, 1109, 1050, 974, 875, 789, 749, 679, 631 cm<sup>-1</sup>; <sup>1</sup>H NMR (300 MHz, CDCl<sub>3</sub>): δ (ppm): 3.10 (s, 3H), 3.33 (s, 3H), 3.51 (s, 3H), 3.61 (s, 3H), 4.81 (s, 1H), 5.77 (s, 2H, -NH<sub>2</sub>, D<sub>2</sub>O exchangeable), 7.07-7.11 (t, 3H, *J*= 6 Hz), 7.18-7.21 (dd, 1H, *J*= 3,3 Hz); <sup>13</sup>C NMR (75 MHz, CDCl<sub>3</sub>): δ (ppm): 27.62, 28.12, 29.05, 29.20, 30.31, 87.78, 93.52, 115.51, 123.52, 125.13, 127.75, 128.32, 150.17, 150.72, 151.10, 151.47, 160.95, 164.01; MS (EI): 397 (m/z).

**Entry b, Table 3:** 5-(6-amino-1,3-dimethyl-2,4-dioxo-1,2,3,4-tetrahydropyrimidin-5-yl)-7-methoxy-1,3-dimethyl-1,5-dihydro-2*H*-chromeno[2,3-*d*]pyrimidine-2,4(3*H*)-dione

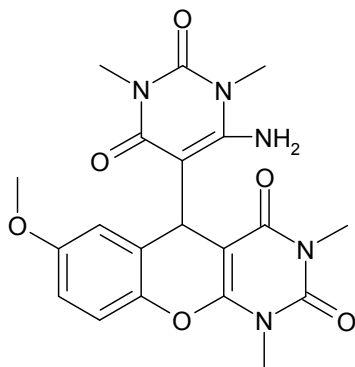

White solid; M.P. 255-258 °C; IR (KBr): 3400, 3253, 2955, 1704, 1614, 1486, 1421, 1279, 1222, 1081, 1034, 977, 851, 809, 786, 767, 753, 689, 653  $\text{cm}^{-1}$ ;  $^1\text{H}$  NMR (300 MHz,  $\text{CDCl}_3$ ) :  $\delta$  (ppm): 3.12 (s, 3H), 3.33 (s, 3H), 3.48-3.49 (d, 3H,  $J=3$  Hz), 3.57 (s, 3H), 3.78 (s, 3H), 4.82 (s, 1H), 5.78 (s, 2H,  $-\text{NH}_2$ ,  $\text{D}_2\text{O}$  exchangeable), 6.59-6.60 (d, 1H,  $J=3$  Hz), 6.73-6.77 (dd, 1H,  $J=3,3$  Hz), 7.04-7.07 (d, 1H,  $J=6$  Hz);  $^{13}\text{C}$  NMR (75 MHz,  $\text{CDCl}_3$ ):  $\delta$  (ppm): 18.72, 27.33, 27.90, 29.01, 30.08, 55.46, 56.79, 87.25, 91.11, 112.57, 113.36, 116.17, 125.45, 144.51, 150.34, 151.23, 152.29, 154.02, 156.46, 160.78, 162.49; MS (EI): 427 (m/z).

**Entry c, Table 3:** 5-(6-amino-1,3-dimethyl-2,4-dioxo-1,2,3,4-tetrahydropyrimidin-5-yl)-9-ethoxy-1,3-dimethyl-1,5-dihydro-2H-chromeno[2,3-d]pyrimidine-2,4(3H)-dione

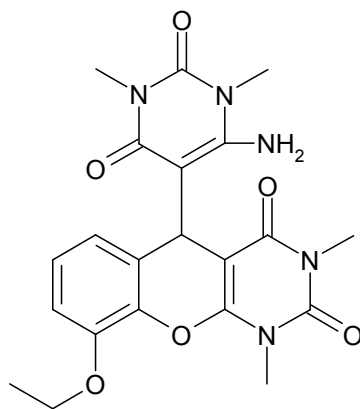

White solid; M.P. 258-260 °C; IR (KBr): 3467, 3382, 3238, 1676, 1646, 1602, 1495, 1452, 1277, 1215, 1139, 1055, 924, 857, 836, 791, 776, 753, 683, 645  $\text{cm}^{-1}$ ;  $^1\text{H}$  NMR (300 MHz,  $\text{CDCl}_3$ ) :  $\delta$  (ppm): 1.44-1.49 (t, 3H,  $J=6$  Hz), 3.12 (s, 3H), 3.33 (s, 3H), 3.48 (s, 3H), 3.60 (s, 3H), 4.07-4.13 (m, 2H), 4.84 (s, 1H), 5.75 (s, 2H,  $-\text{NH}_2$ ,  $\text{D}_2\text{O}$  exchangeable), 6.62-6.65 (d, 1H,  $J=9$  Hz), 6.76-6.79 (d, 1H,  $J=9$  Hz), 6.95-7.00 (t, 1H,  $J=9$  Hz);  $^{13}\text{C}$  NMR (75 MHz,  $\text{CDCl}_3$ ):  $\delta$  (ppm): 14.81, 27.69, 28.08, 29.22, 30.54, 64.37,

87.58, 93.17, 111.41, 119.44, 124.41, 124.70, 140.38, 146.59, 150.51, 151.51, 154.29, 161.20, 164.04; MS (EI): 441 (m/z).

**Entry d, Table 3:** 5-(6-amino-1,3-dimethyl-2,4-dioxo-1,2,3,4-tetrahydropyrimidin-5-yl)-9-hydroxy-1,3-dimethyl-1,5-dihydro-2*H*-chromeno[2,3-*d*]pyrimidine-2,4(3*H*)-dione

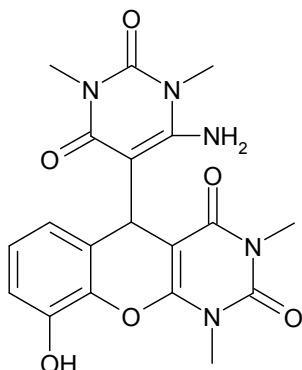

White solid; M.P. 248-250 °C; IR (KBr): 3521, 3461, 3372, 3234, 2950, 1692, 1622, 1476, 1332, 1216, 1145, 1087, 1049, 964, 858, 791, 770, 754, 725, 686, 638 cm<sup>-1</sup>; <sup>1</sup>H NMR (300 MHz, DMSO-*d*<sub>6</sub>) : δ (ppm): 2.91 (s, 3H), 3.14 (s, 3H), 3.34 (s, 3H), 3.45 (s, 3H), 5.02 (s, 1H), 6.51-6.54 (d, 1H, *J* = 9 Hz), 6.71-6.74 (d, 1H, *J* = 9 Hz), 6.82-6.88 (t, 1H, *J* = 9 Hz) 7.06 (s, 2H, -NH<sub>2</sub>, D<sub>2</sub>O exchangeable), 9.68 (s, 1H, -OH, D<sub>2</sub>O exchangeable); <sup>13</sup>C NMR (75 MHz, DMSO-*d*<sub>6</sub>): δ (ppm): 27.39, 27.98, 29.37, 30.36, 87.51, 90.77, 114.88, 118.75, 124.87, 125.90, 139.08, 139.84, 144.82, 150.62, 151.28, 152.09, 153.75, 160.58, 161.83; MS (EI): 413 (m/z).

**Entry e, Table 3:** 5-(6-amino-1,3-dimethyl-2,4-dioxo-1,2,3,4-tetrahydropyrimidin-5-yl)-8-hydroxy-1,3-dimethyl-1,5-dihydro-2*H*-chromeno[2,3-*d*]pyrimidine-2,4(3*H*)-dione

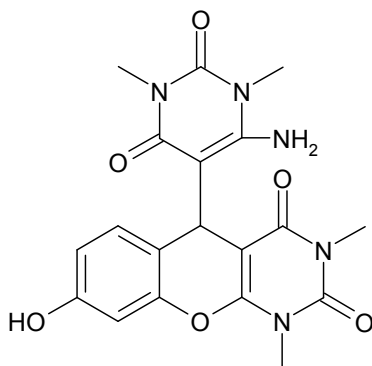

White solid; M.P. 233-235 °C; IR (KBr): 3568, 3415, 3231, 2950, 1658, 1632, 1587, 1493, 1460, 1371, 1253, 1219, 1197, 1102, 1046, 970, 789, 750, 679, 629 cm<sup>-1</sup>; <sup>1</sup>H NMR (300 MHz, DMSO-*d*<sub>6</sub>) : δ (ppm): 2.90 (s, 3H), 3.14 (s, 3H), 3.34 (s, 3H), 3.42 (s, 3H),

4.93 (s, 1H), 6.49-6.52 (d, 2H,  $J=9$  Hz), 6.87-6.90 (d, 1H,  $J=9$  Hz), 7.01 (s, 2H,  $-\text{NH}_2$ ,  $\text{D}_2\text{O}$  exchangeable), 9.60 (s, 1H,  $-\text{OH}$ ,  $\text{D}_2\text{O}$  exchangeable);  $^{13}\text{C}$  NMR (75 MHz,  $\text{DMSO-d}_6$ ):  $\delta$  (ppm): 27.37, 28.00, 28.60, 29.26, 30.34, 88.03, 90.93, 102.52, 112.94, 115.13, 129.35, 150.42, 150.58, 151.30, 152.02, 153.79, 156.91, 160.51, 161.83; MS (EI): 413 (m/z).

**Entry f, Table 3:** 5-(6-amino-1,3-dimethyl-2,4-dioxo-1,2,3,4-tetrahydropyrimidin-5-yl)-7-hydroxy-1,3-dimethyl-1,5-dihydro-2*H*-chromeno[2,3-*d*]pyrimidine-2,4(3*H*)-dione

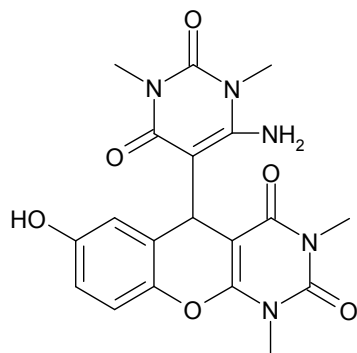

White solid; M.P. 220-224 °C; IR (KBr): 3444, 3333, 1681, 1615, 1486, 1448, 1399, 1352, 1323, 1285, 1223, 1200, 1115, 976, 894, 806, 790, 767, 752, 672, 618  $\text{cm}^{-1}$ ;  $^1\text{H}$  NMR (300 MHz,  $\text{DMSO-d}_6$ ):  $\delta$  (ppm): 2.19 (s, 3H), 3.13 (s, 3H), 3.35 (s, 3H), 3.41 (s, 3H), 4.99 (s, 1H), 6.48-6.49 (d, 1H,  $J=3$  Hz), 6.55-6.59 (dd, 1H,  $J=3,3$  Hz), 6.93-6.96 (d, 1H,  $J=9$  Hz) 7.06 (s, 2H,  $-\text{NH}_2$ ,  $\text{D}_2\text{O}$  exchangeable), 9.27 (s, 1H,  $-\text{OH}$ ,  $\text{D}_2\text{O}$  exchangeable);  $^{13}\text{C}$  NMR (75 MHz,  $\text{DMSO-d}_6$ ):  $\delta$  (ppm): 27.40, 27.97, 29.17, 29.53, 30.39, 87.05, 90.64, 114.39, 114.61, 116.69, 125.66, 143.09, 150.60, 151.29, 152.13, 153.98, 154.48, 160.52, 161.81; MS (EI): 413 (m/z).

**Entry g, Table 3:** 5-(6-amino-1,3-dimethyl-2,4-dioxo-1,2,3,4-tetrahydropyrimidin-5-yl)-8,9-dihydroxy-1,3-dimethyl-1,5-dihydro-2*H*-chromeno[2,3-*d*]pyrimidine-2,4(3*H*)-dione

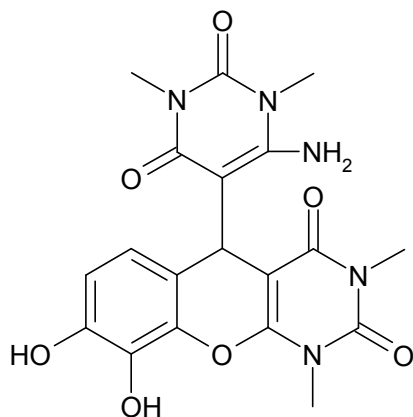

White solid; M.P. 242-2345 °C; IR (KBr): 3474, 3412, 3313, 3219, 1684, 1630, 1492, 1323, 1275, 1217, 1194, 1059, 997, 968, 817, 781, 792, 756, 689, 617 cm<sup>-1</sup>; <sup>1</sup>H NMR (300 MHz, DMSO-d<sub>6</sub>) : δ (ppm): 2.91 (s, 3H), 3.14 (s, 3H), 3.33 (s, 3H), 3.47 (s, 3H), 4.93 (s, 1H), 6.36-6.39 (d, 1H, *J*= 9 Hz), 6.49-6.52 (d, 1H, *J*= 9 Hz), 6.99 (s, 2H, -NH<sub>2</sub>, D<sub>2</sub>O exchangeable), 8.80 (s, 1H, -OH, D<sub>2</sub>O exchangeable), 9.19 (s, 1H, -OH, D<sub>2</sub>O exchangeable); <sup>13</sup>C NMR (75 MHz, DMSO-d<sub>6</sub>): δ (ppm): 27.37, 27.98, 28.95, 29.42, 30.33, 87.78, 91.14, 112.25, 116.23, 117.77, 132.69, 140.01, 145.36, 150.64, 151.30, 151.89, 153.76, 161.90; MS (EI): 274 (m/z) (base peak).

**Entry h, Table 3:** 5-(6-amino-1,3-dimethyl-2,4-dioxo-1,2,3,4-tetrahydropyrimidin-5-yl)-7-chloro-1,3-dimethyl-1,5-dihydro-2*H*-chromeno[2,3-*d*]pyrimidine-2,4(3*H*)-dione

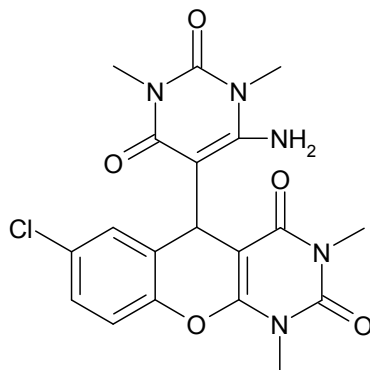

White solid; M.P. 255-258 °C; IR (KBr): 3423, 3371, 3065, 2950, 1698, 1644, 1471, 1443, 1264, 1241, 1192, 1124, 1080, 1042, 977, 867, 851, 787, 766, 748, 664 cm<sup>-1</sup>; <sup>1</sup>H NMR (300 MHz, DMSO-d<sub>6</sub>) : δ (ppm): 2.90 (s, 3H), 3.14 (s, 3H), 3.35 (s, 3H), 3.43 (s, 3H), 5.08 (s, 1H), 7.08-7.09 (d, 1H, *J*= 3 Hz), 7.13 (s, 2H, -NH<sub>2</sub>, D<sub>2</sub>O exchangeable), 7.22-7.28 (m, 2H); <sup>13</sup>C NMR (75 MHz, DMSO-d<sub>6</sub>): δ (ppm): 27.44, 28.05, 29.32, 30.41, 87.26, 90.25, 118.00, 127.19, 127.72, 128.22, 128.65, 148.97, 150.51, 151.26, 152.36, 153.62, 160.70, 161.66; MS (EI): 431 (m/z).

**Entry i, Table 3:** 5-(6-amino-1,3-dimethyl-2,4-dioxo-1,2,3,4-tetrahydropyrimidin-5-yl)-7-bromo-1,3-dimethyl-1,5-dihydro-2*H*-chromeno[2,3-*d*]pyrimidine-2,4(3*H*)-dione



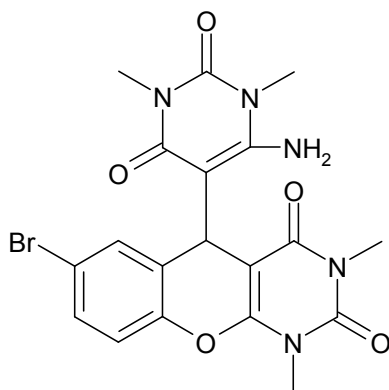

White solid; M.P. 285-287 °C; IR (KBr): 3395, 3251, 2952, 1709, 1634, 1497, 1471, 1404, 1239, 1182, 1115, 1048, 977, 781, 765, 752, 687, 618 cm<sup>-1</sup>; <sup>1</sup>H NMR (300 MHz, DMSO-d<sub>6</sub>) : δ (ppm): 2.91 (s, 3H), 3.14 (s, 3H), 3.35 (s, 3H), 3.43 (s, 3H), 5.08 (s, 1H), 7.13 (s, 2H, -NH<sub>2</sub>, D<sub>2</sub>O exchangeable), 7.16 (s, 1H), 7.21-7.22 (d, 1H, *J*= 3 Hz), 7.36-7.40 (dd, 1H, *J*= 3,3 Hz); <sup>13</sup>C NMR (75 MHz, DMSO-d<sub>6</sub>): δ (ppm): 27.43, 28.04, 29.10, 29.31, 30.41, 49.06, 79.62, 87.33, 90.25, 116.38, 118.38, 127.64, 130.57, 131.13, 149.46, 150.50, 151.25, 152.34, 153.57, 160.68, 161.63; MS (EI): 475 (m/z).

**Entry j, Table 3:** 5-(6-amino-1,3-dimethyl-2,4-dioxo-1,2,3,4-tetrahydropyrimidin-5-yl)-1,3-dimethyl-7-nitro-1,5-dihydro-2*H*-chromeno[2,3-*d*]pyrimidine-2,4(3*H*)-dione

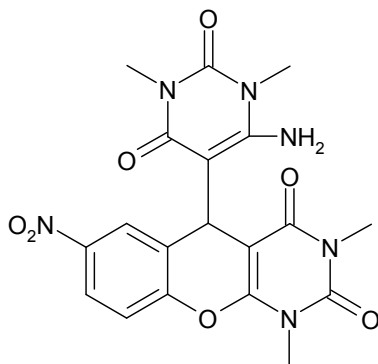

Yellow solid; M.P. 224-226 °C; IR (KBr): 3411, 3230, 2956, 1697, 1639, 1523, 1475, 1375, 1339, 1242, 1198, 1122, 1087, 977, 935, 891, 845, 766, 754, 635 cm<sup>-1</sup>; <sup>1</sup>H NMR (300 MHz, DMSO-d<sub>6</sub>) : δ (ppm): 2.90 (s, 3H), 3.16 (s, 3H), 3.37 (s, 3H), 3.47 (s, 3H), 5.21 (s, 1H), 7.22 (s, 2H, -NH<sub>2</sub>, D<sub>2</sub>O exchangeable), 7.42-7.45 (d, 1H, *J*= 9 Hz), 7.96-7.97 (d, 1H, *J*= 3 Hz), 8.08-8.12 (dd, 1H, *J*= 3,3 Hz); <sup>13</sup>C NMR (75 MHz, DMSO-d<sub>6</sub>): δ (ppm): 28.39, 30.50, 32.41, 115.15, 123.89, 124.24, 128.77, 139.74, 150.82, 154.08, 162.39, 163.04; MS (EI): 442 (m/z).

**Entry k, Table 3:**

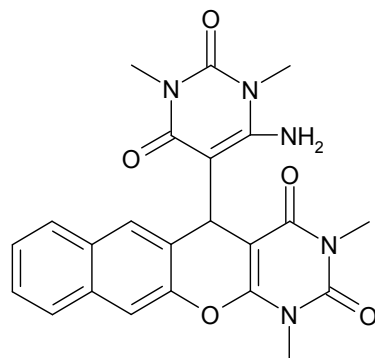

White solid; M.P. 256-258 °C; IR (KBr): 3424, 3204, 2956, 1674, 1634, 1459, 1324, 1279, 1235, 1118, 993, 925, 806, 783, 754, 617  $\text{cm}^{-1}$ ;  $^1\text{H}$  NMR (300 MHz, DMSO- $d_6$ ):  $\delta$  (ppm): 2.81 (s, 3H), 3.21 (s, 3H), 3.37 (s, 3H), 3.49 (s, 3H), 5.48 (s, 1H), 7.31 (s, 2H, -NH<sub>2</sub>, D<sub>2</sub>O exchangeable), 7.39-7.51 (m, 2H), 7.83-7.90 (m, 3H), 8.31 (s, 1H);  $^{13}\text{C}$  NMR (75 MHz, DMSO- $d_6$ ): Due to insufficient solubility of compound we are unable to scan its  $^{13}\text{C}$  NMR; MS (EI): 447 (m/z).

**Spectral data of synthesized Pyranopyrimidinetrione compounds:**

**Entry a, Table 4:** 5-(1,3-dimethyl-2,4-dioxo-1,3,4,5-tetrahydro-2H-chromeno[2,3-d]pyrimidin-5-yl)-1,3-dimethylpyrimidine-2,4,6(1H,3H,5H)-trione

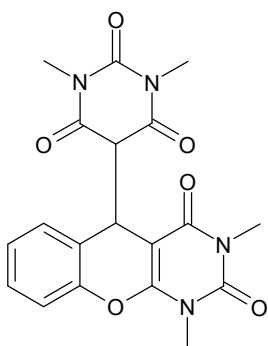

Yellow solid; M.P. 226 °C; IR (KBr): 3399, 3225, 2957, 1668, 1583, 1455, 1379, 1317, 1290, 1253, 1236, 1203, 1119, 1039, 973, 925, 860, 791, 760, 753, 684  $\text{cm}^{-1}$ ;  $^1\text{H}$  NMR (300 MHz, CDCl<sub>3</sub>):  $\delta$  (ppm): 3.08 (s, 3H), 3.27 (s, 3H), 3.36 (s, 3H), 3.56 (s, 3H), 4.08-4.09 (d, 1H,  $J=3$  Hz), 5.09-5.10 (d, 1H,  $J=3$  Hz), 7.09-7.18 (m, 3H), 7.30-7.33 (dd, 1H,  $J=3,3$  Hz);  $^{13}\text{C}$  NMR (75 MHz, CDCl<sub>3</sub>):  $\delta$  (ppm): 28.13, 28.29, 28.54, 29.16, 36.16, 54.18, 86.24, 116.78, 120.18, 126.11, 127.85, 129.47, 149.71, 150.56, 151.18, 154.59,

161.99, 166.92, 167.08; MS (EI):  $[M^+]$  398 (m/z) and Base peak 243 (m/z).

**Entry b, Table 4:** 5-(7-methoxy-1,3-dimethyl-2,4-dioxo-1,3,4,5-tetrahydro-2H-chromeno[2,3-d]pyrimidin-5-yl)-1,3-dimethylpyrimidine-2,4,6(1H,3H,5H)-trione

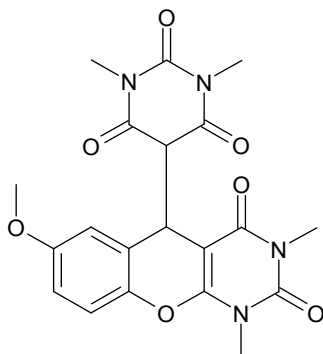

White solid; M.P. 194 °C; IR (KBr): 3509, 3405, 3255, 2957, 2919, 2888, 1679, 1659, 1635, 1485, 1379, 1276, 1237, 1038, 815, 758  $\text{cm}^{-1}$ ;  $^1\text{H}$  NMR (300 MHz,  $\text{CDCl}_3$ ):  $\delta$  (ppm): 3.10 (s, 3H), 3.28 (s, 3H), 3.36 (s, 3H), 3.54 (s, 3H), 3.77 (s, 3H), 4.13-4.14 (d, 1H,  $J=3$  Hz), 5.10-5.11 (d, 1H,  $J=3$  Hz), 6.66-6.67 (d, 1H,  $J=3$  Hz), 6.81-6.85 (dd, 1H,  $J=3,3$  Hz), 7.05-7.08 (d, 1H,  $J=9$  Hz);  $^{13}\text{C}$  NMR (75 MHz,  $\text{CDCl}_3$ ):  $\delta$  (ppm): 28.09, 28.34, 28.53, 29.10, 36.47, 54.06, 55.71, 85.60, 111.86, 115.24, 117.67, 121.01, 143.65, 150.57, 151.22, 154.75, 157.32, 162.06, 166.92, 167.12; MS (EI):  $[M^+]$  426 (m/z) and Base peak 273 (m/z).

**Entry c, Table 4:** 5-(7-ethoxy-1,3-dimethyl-2,4-dioxo-1,3,4,5-tetrahydro-2H-chromeno[2,3-d]pyrimidin-5-yl)-1,3-dimethylpyrimidine-2,4,6(1H,3H,5H)-trione

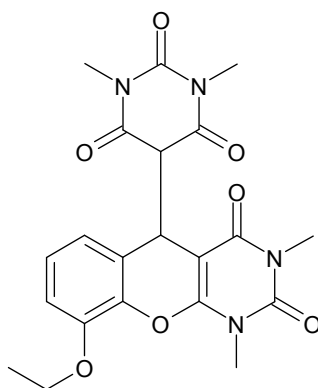

White solid; M.P. 206-208 °C; IR (ZnSe): 2878, 1680, 1658, 1636, 1588, 1468, 1443, 1415, 1378, 1343, 1269, 1230, 1144, 1098, 1005, 970, 893, 780, 754  $\text{cm}^{-1}$ ;  $^1\text{H}$  NMR (300 MHz,  $\text{CDCl}_3$ ):  $\delta$  (ppm): 1.45-1.50 (t, 3H,  $J=6$  Hz), 3.09 (s, 3H), 3.28 (s, 3H), 3.38 (s, 3H), 3.58 (s, 3H), 4.08-4.13 (m, 3H), 5.12-5.13 (d, 1H,  $J=3$  Hz), 6.68-6.71 (d, 1H,  $J=9$

Hz), 6.86-6.88 (t, 1H,  $J=6$  Hz), 7.05-7.10 (t, 1H,  $J=6$  Hz):  $^{13}\text{C}$  NMR (75 MHz,  $\text{CDCl}_3$ ):  $\delta$  (ppm): 14.73, 28.09, 28.30, 28.50, 29.11, 36.68, 54.09, 64.64, 85.97, 112.77, 118.59, 121.06, 125.78, 139.60, 147.48, 150.65, 151.28, 154.60, 162.05, 166.94, 167.11; MS (EI):  $[\text{M}^+]$  442 (m/z) and Base peak 288 (m/z).

**Entry d, Table 4:** 5-(7-hydroxy-1,3-dimethyl-2,4-dioxo-1,3,4,5-tetrahydro-2H-chromeno[2,3-*d*]pyrimidin-5-yl)-1,3-dimethylpyrimidine-2,4,6(1*H*,3*H*,5*H*)-trione

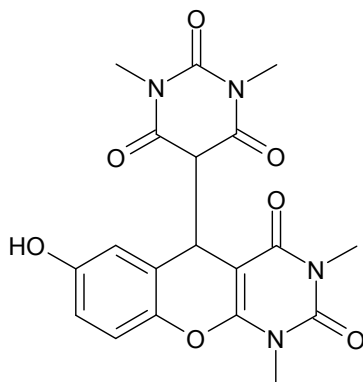

White solid; M.P. 230  $^{\circ}\text{C}$ ; IR (KBr): 3406, 3196, 2961, 1681, 1455, 1381, 1318, 1277, 1225, 1120, 1049, 994, 979, 888, 866, 829, 810, 755, 677, 640  $\text{cm}^{-1}$ ;  $^1\text{H}$  NMR (300 MHz,  $\text{DMSO-d}_6$ ):  $\delta$  (ppm): 2.85 (s, 3H), 3.12 (s, 3H), 3.20 (s, 3H), 3.38 (s, 3H), 3.93-3.94 (d, 1H,  $J=3$  Hz), 4.68 (s, 1H), 6.44 (s, 1H), 6.69-6.72 (d, 1H,  $J=9$  Hz), 7.07-7.10 (d, 1H,  $J=9$  Hz), 9.67 (s, 1H, -OH);  $^{13}\text{C}$  NMR (75 MHz,  $\text{DMSO-d}_6$ ):  $\delta$  (ppm): 28.14, 28.18, 28.44, 29.24, 37.14, 54.31, 85.30, 91.37, 113.31, 116.64, 118.09, 120.52, 142.45, 150.47, 151.65, 154.88, 155.36, 161.72, 167.44, 168.06; MS (EI):  $[\text{M}^+]$  414 (m/z) and Base peak 259 (m/z).

**Entry e, Table 4:** 5-(6-amino-1,3-dimethyl-2,4-dioxo-1,2,3,4-tetrahydropyrimidin-5-yl)-1,3-dimethyl-7-nitro-1,5-dihydro-2H-chromeno[2,3-*d*]pyrimidine-2,4(3*H*)-dione

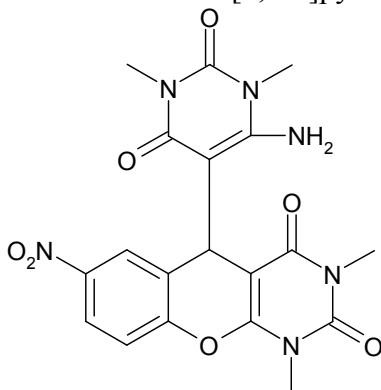

Yellow solid; M.P. 224-226  $^{\circ}\text{C}$ ; IR (KBr): 3409, 3159, 2950, 1697, 1674, 1636, 1448,

1400, 1338, 1241, 1198, 1121, 891, 844, 753, 618  $\text{cm}^{-1}$ ;  $^1\text{H}$  NMR (300 MHz,  $\text{DMSO-d}_6$ ) :  $\delta$  (ppm): 3.11 (s, 6H), 3.53 (s, 6H), 5.51 (s, 1H), 6.81-6.82 (d, 1H,  $J=3$  Hz ) 7.90 (s, 2H, - $\text{NH}_2$ ), 7.89-7.90 (d, 1H,  $J=3$  Hz), 7.95-7.96 (d, 1H,  $J=3$  Hz); MS (EI): 442 (m/z).

**Entry f, Table 4:** 5-(6-amino-1,3-dimethyl-2,4-dioxo-1,2,3,4-tetrahydropyrimidin-5-yl)-7,9-dichloro-1,3-dimethyl-1,5-dihydro-2*H*-chromeno[2,3-*d*]pyrimidine-2,4(3*H*)-dione

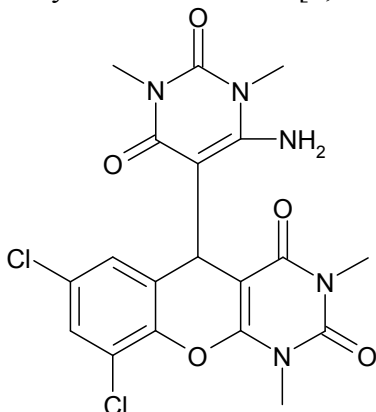

White solid; M.P. 264-266  $^{\circ}\text{C}$ ; IR (KBr): 3456, 3159, 1719, 1695, 1639, 1490, 1451, 1402, 1253, 1183, 1114, 985, 921, 858, 789, 753, 618  $\text{cm}^{-1}$ ;  $^1\text{H}$  NMR (300 MHz,  $\text{DMSO-d}_6$ ) :  $\delta$  (ppm): 2.92 (s, 3H), 3.15 (s, 6H), 3.46 (s, 6H), 5.13 (s, 1H), 7.07 (s, 1H), 7.17 (s, 2H, - $\text{NH}_2$ ), 7.57-7.58 (d, 1H,  $J=3$  Hz);  $^{13}\text{C}$  NMR (75 MHz,  $\text{DMSO-d}_6$ ):  $\delta$  (ppm): 28.09, 28.34, 28.53, 29.31, 30.09, 79.60, 87.35, 90.31, 116.63, 118.39, 127.63, 130.58, 131.13, 149.47, 150.51, 151.27, 152.37, 153.59, 160.73, 161.67.

# $^1\text{H}$ , $^{13}\text{C}$ and MS (ESI) Spectra of ionic liquid:

## $^1\text{H}$ NMR spectrum of ionic liquid

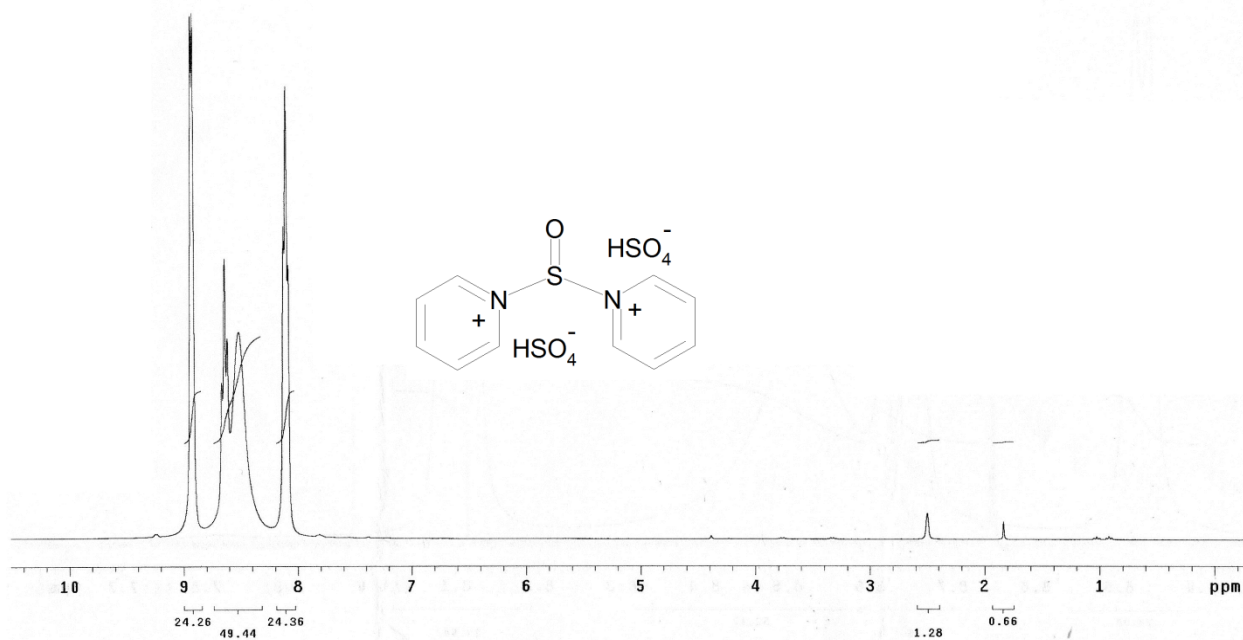

| INDEX | FREQUENCY | PPM   | HEIGHT |
|-------|-----------|-------|--------|
| 1     | 2680.4    | 8.933 | 106.7  |
| 2     | 2675.6    | 8.917 | 107.3  |
| 3     | 2599.8    | 8.664 | 32.2   |
| 4     | 2592.7    | 8.640 | 57.5   |
| 5     | 2585.0    | 8.615 | 41.2   |
| 6     | 2555.5    | 8.516 | 42.6   |
| 7     | 2437.7    | 8.124 | 64.0   |
| 8     | 2431.5    | 8.103 | 92.4   |
| 9     | 2425.3    | 8.083 | 56.2   |

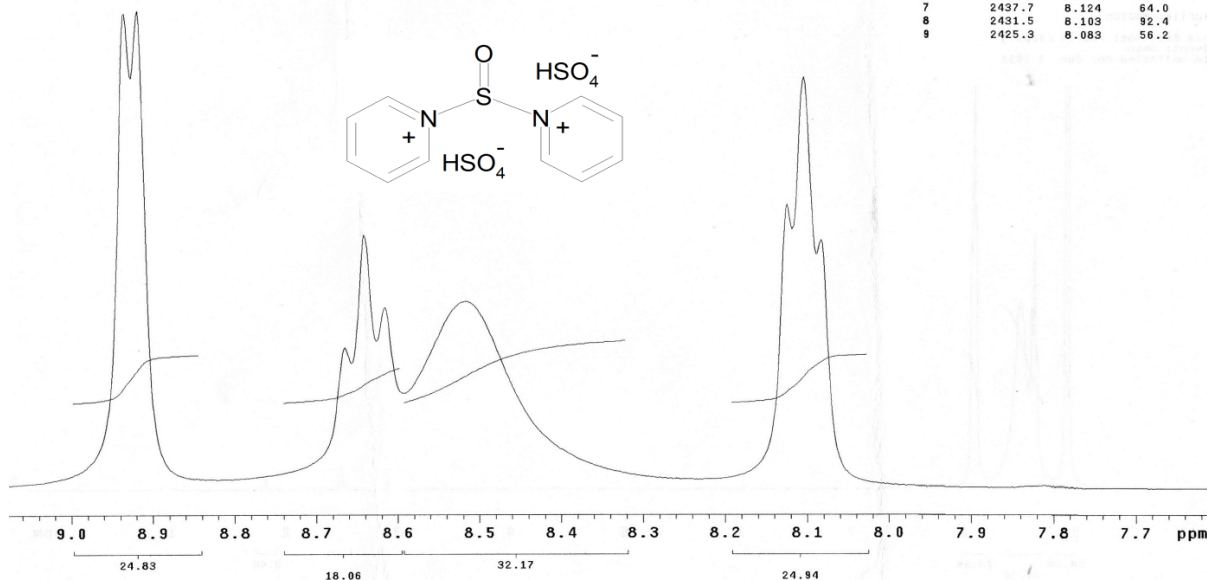

# $^{13}\text{C}$ NMR spectrum of ionic liquid

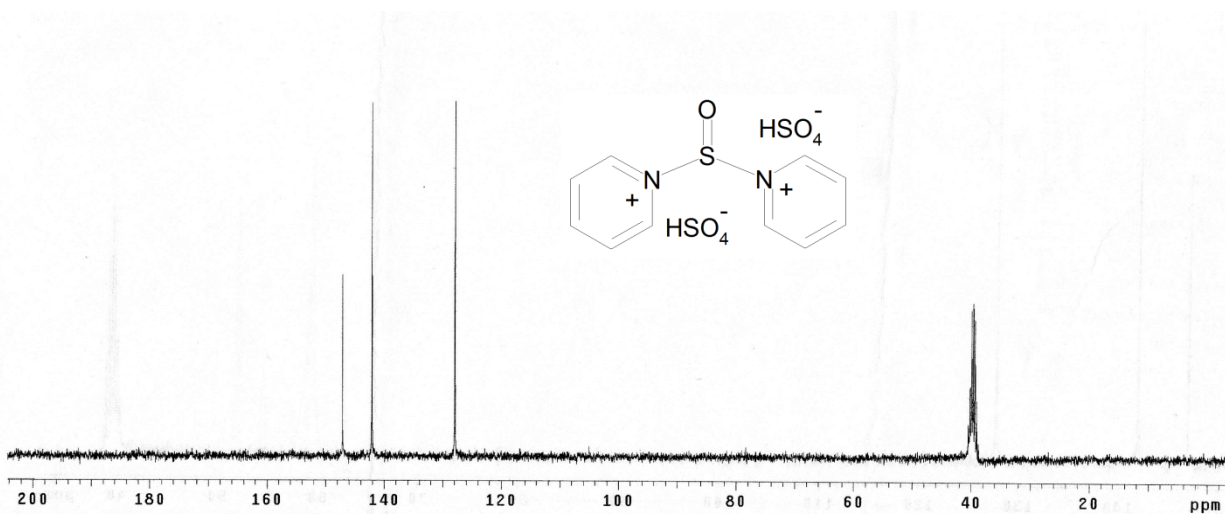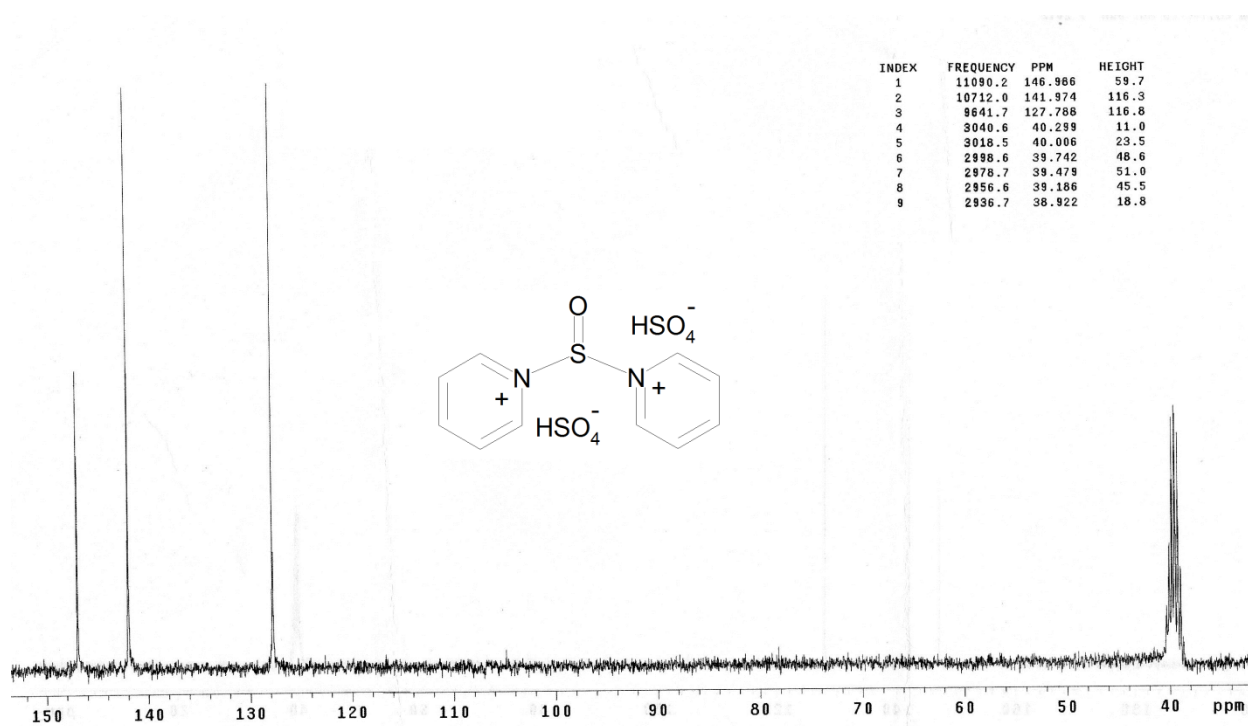

### MS (ESI) spectrum of ionic liquid in '+ve' mode

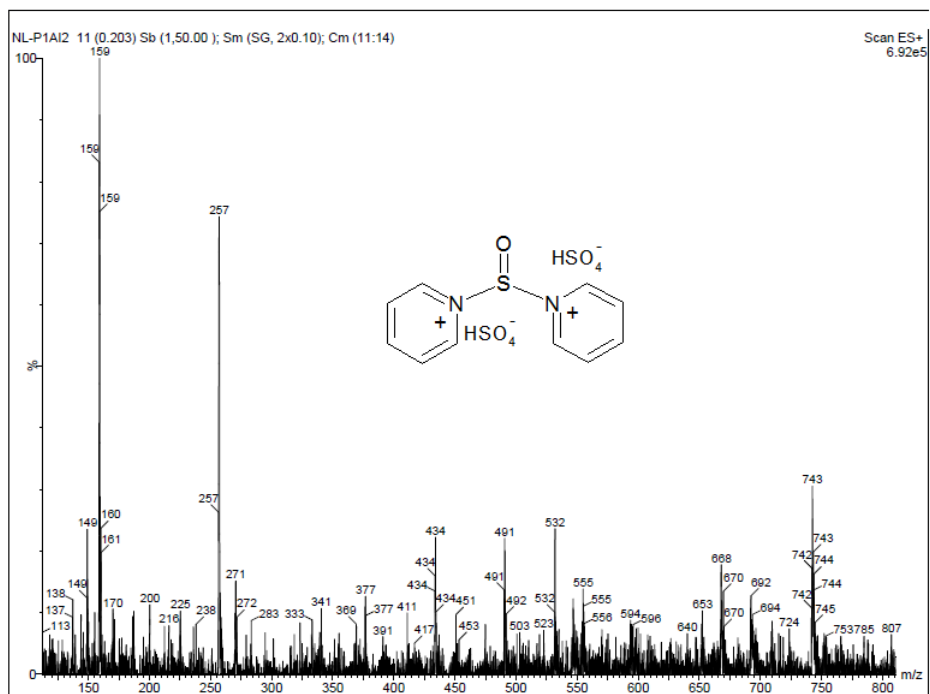

### MS (ESI) spectrum of ionic liquid in '-ve' mode

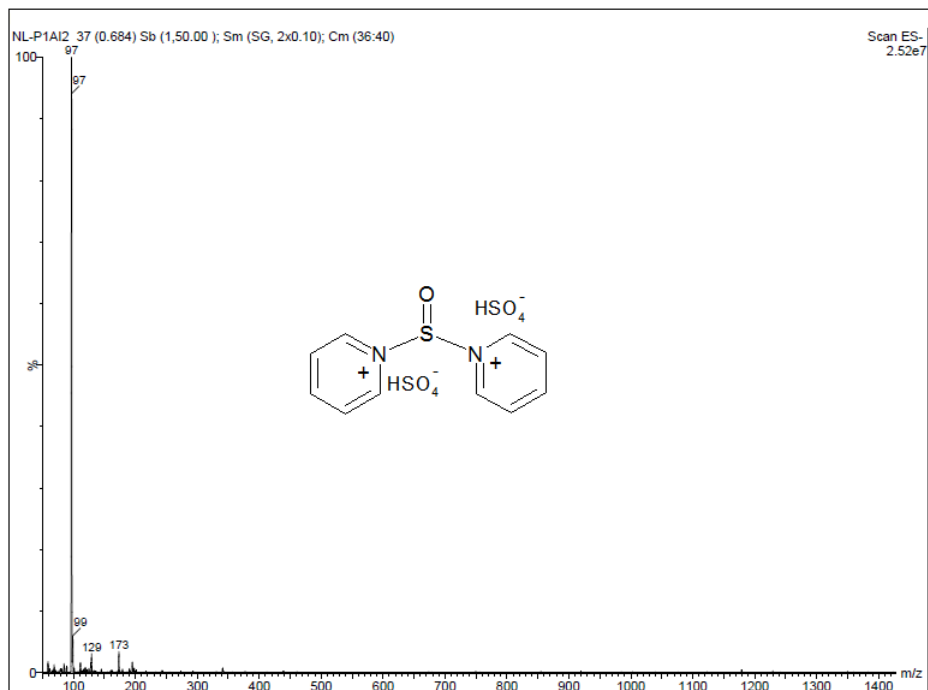



**<sup>1</sup>H NMR, <sup>13</sup>C NMR, IR and MS (EI) spectra of Synthesized Pyranopyrimidinedione products**

**Entry a, Table 3:** 5-(6-amino-1,3-dimethyl-2,4-dioxo-1,2,3,4-tetrahydropyrimidin-5-yl)-1,3-dimethyl-1,5-dihydro-2H-chromeno[2,3-d]pyrimidine-2,4(3H)-dione

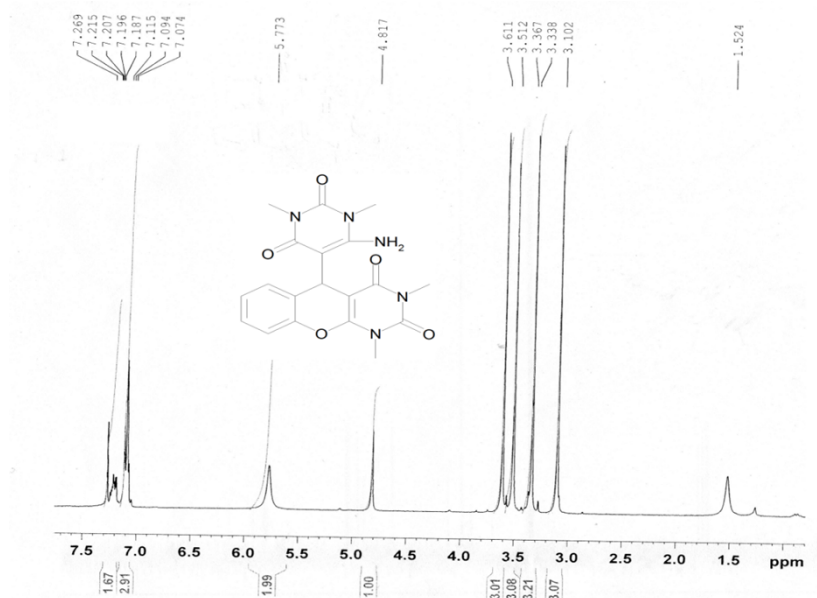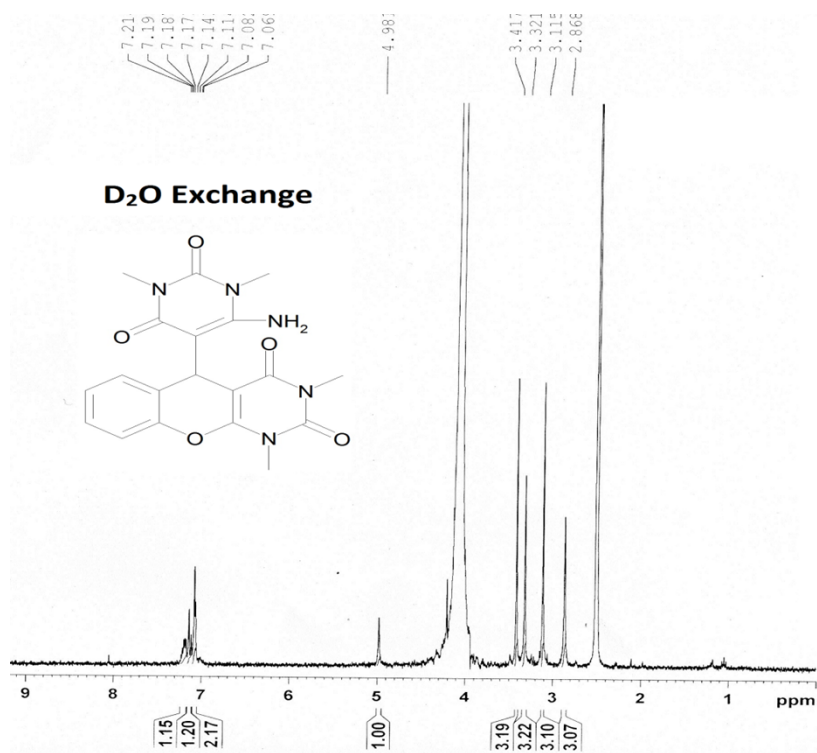

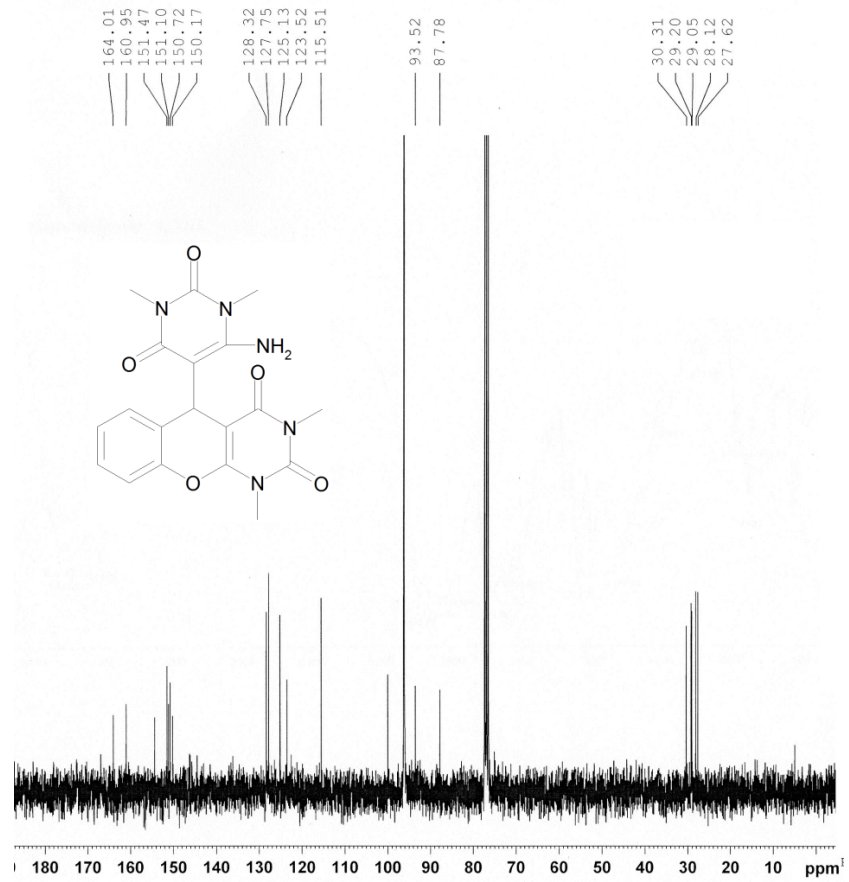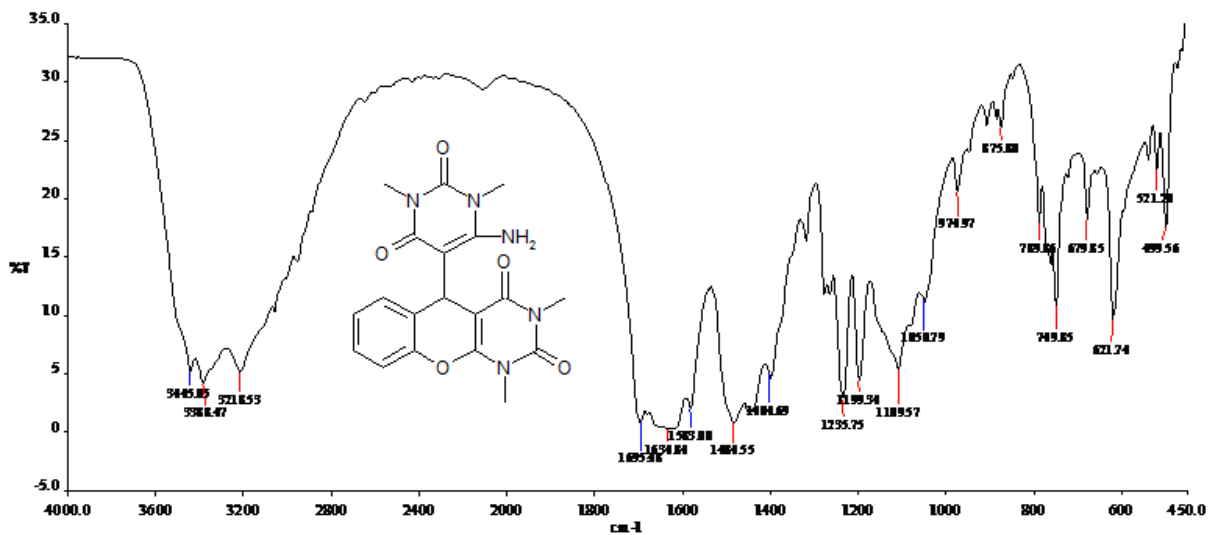

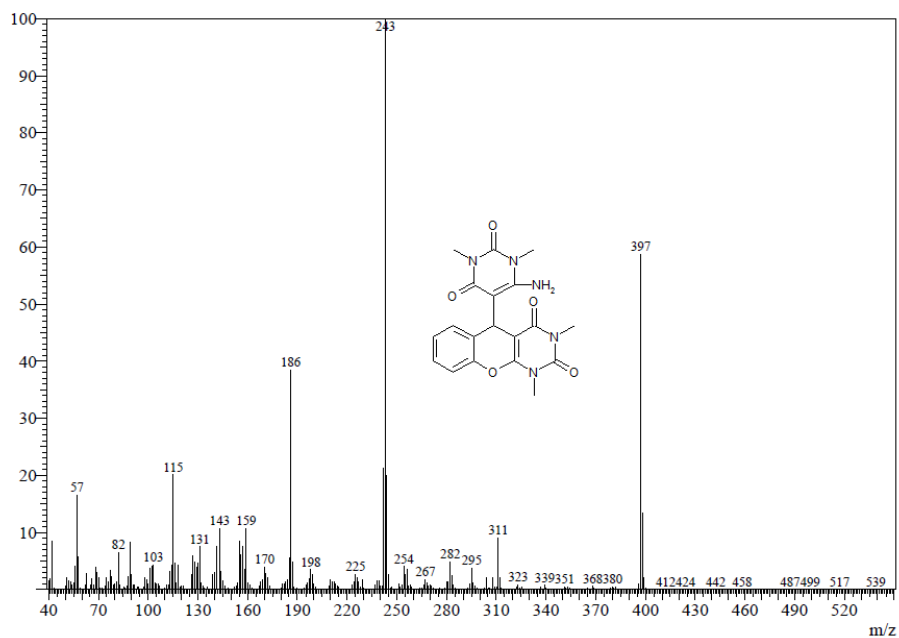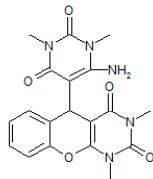

**Entry b, Table 3:** 5-(6-amino-1,3-dimethyl-2,4-dioxo-1,2,3,4-tetrahydropyrimidin-5-yl)-7-methoxy-1,3-dimethyl-1,5-dihydro-2*H*-chromeno[2,3-*d*]pyrimidine-2,4(3*H*)-dione

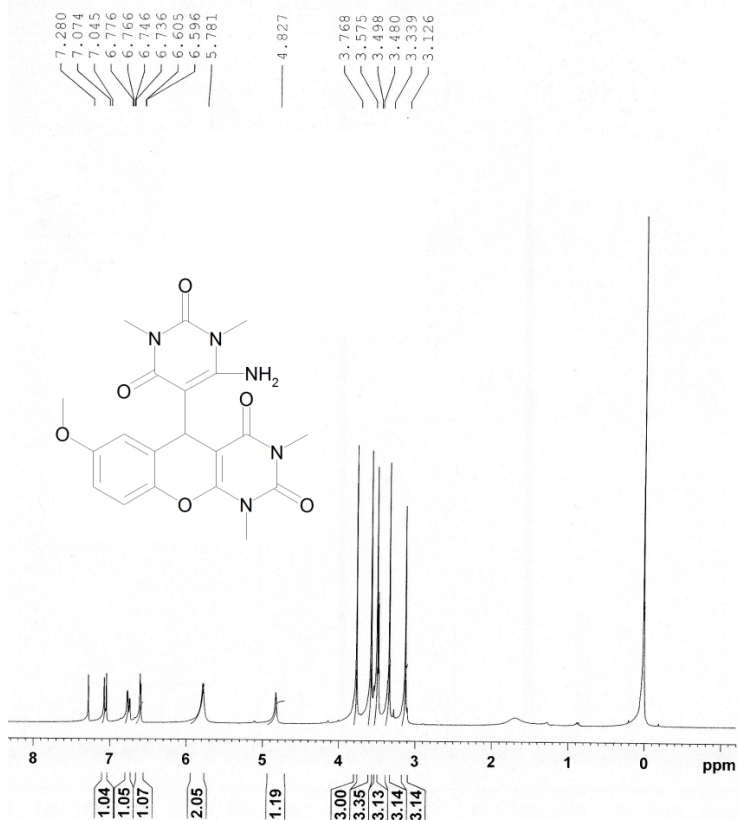

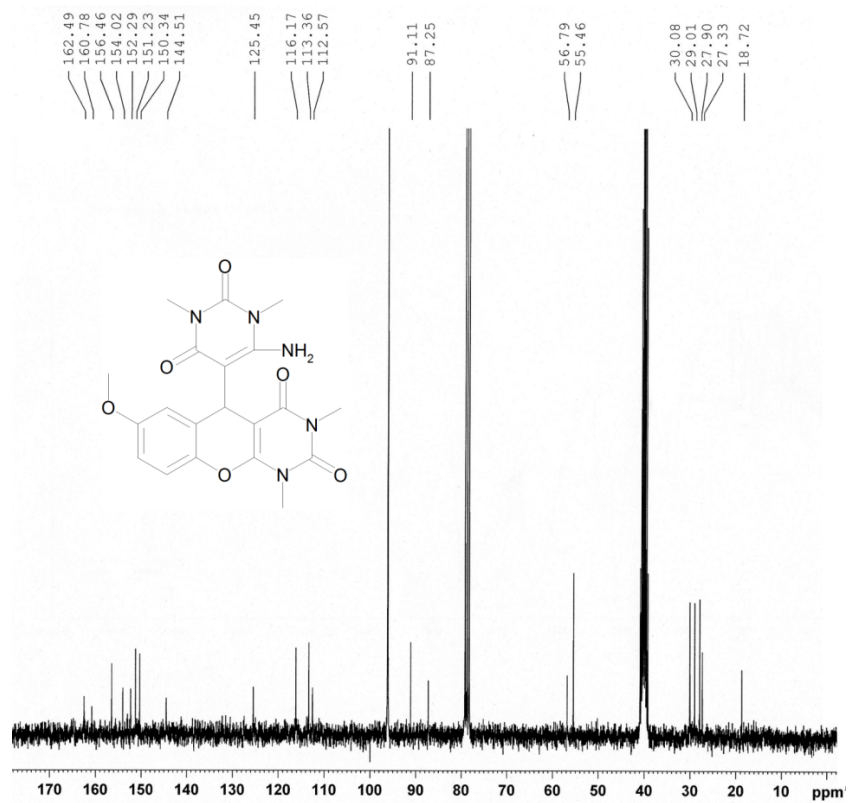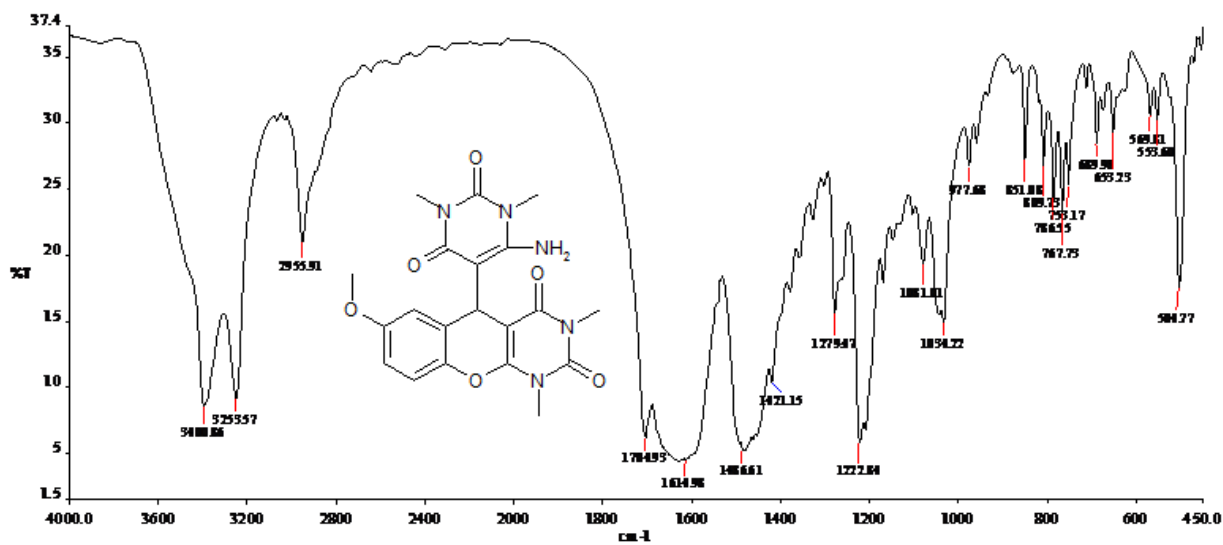

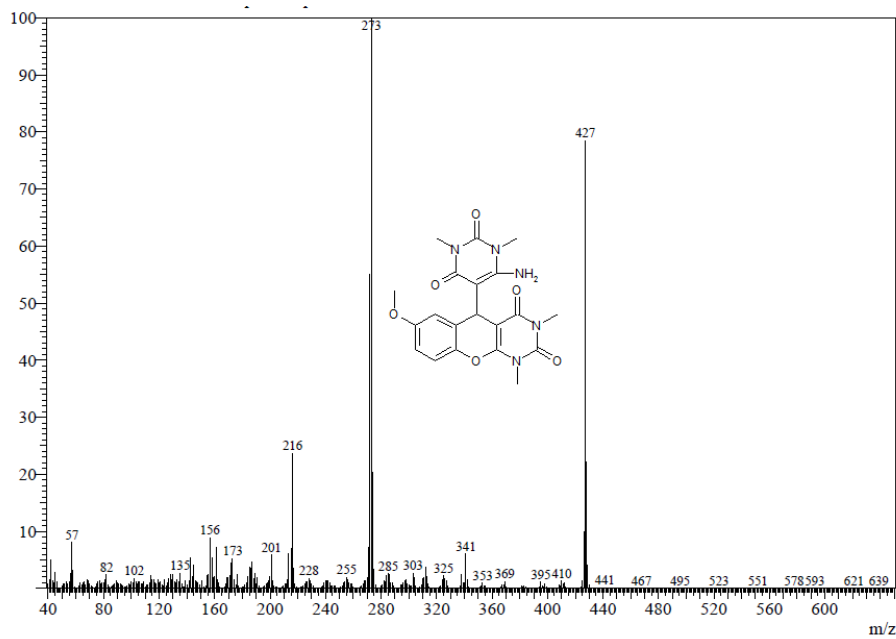

**Entry c, Table 3:** 5-(6-amino-1,3-dimethyl-2,4-dioxo-1,2,3,4-tetrahydropyrimidin-5-yl)-9-ethoxy-1,3-dimethyl-1,5-dihydro-2*H*-chromeno[2,3-*d*]pyrimidine-2,4(3*H*)-dione

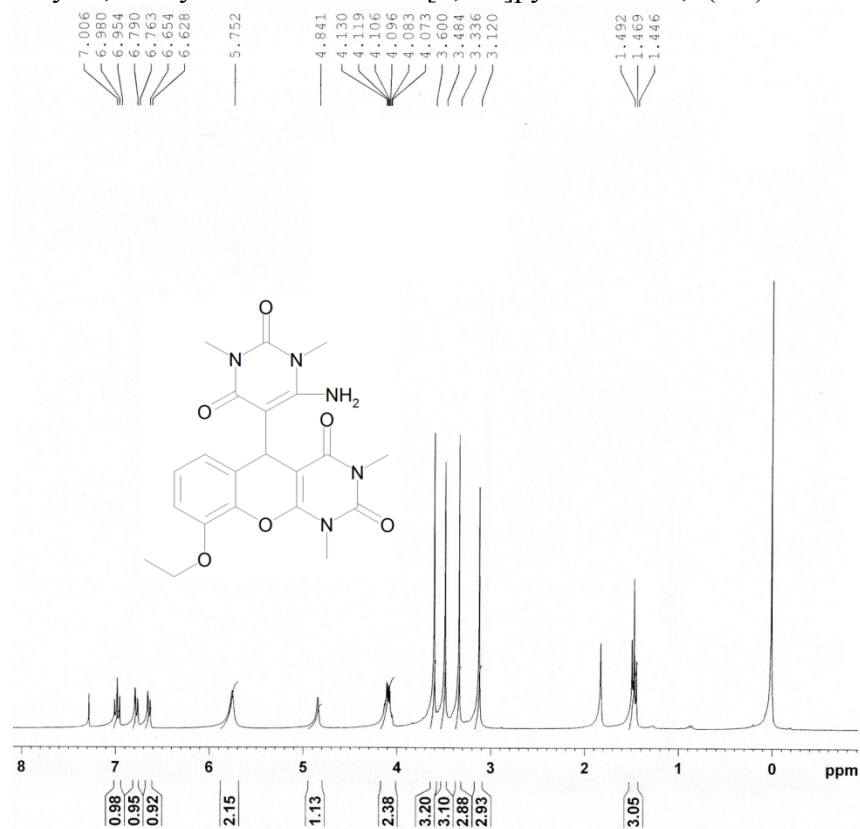

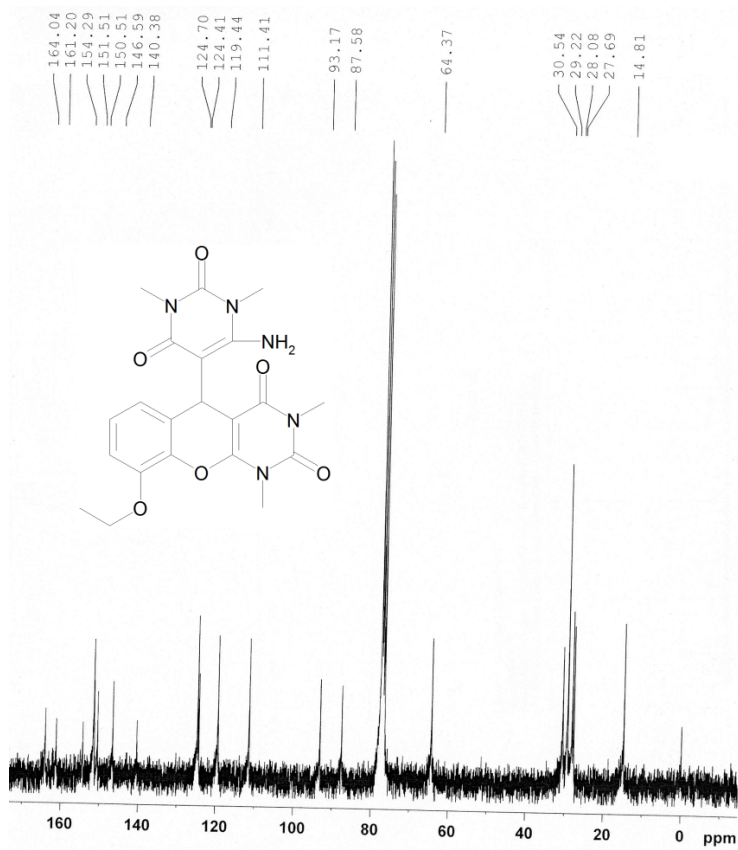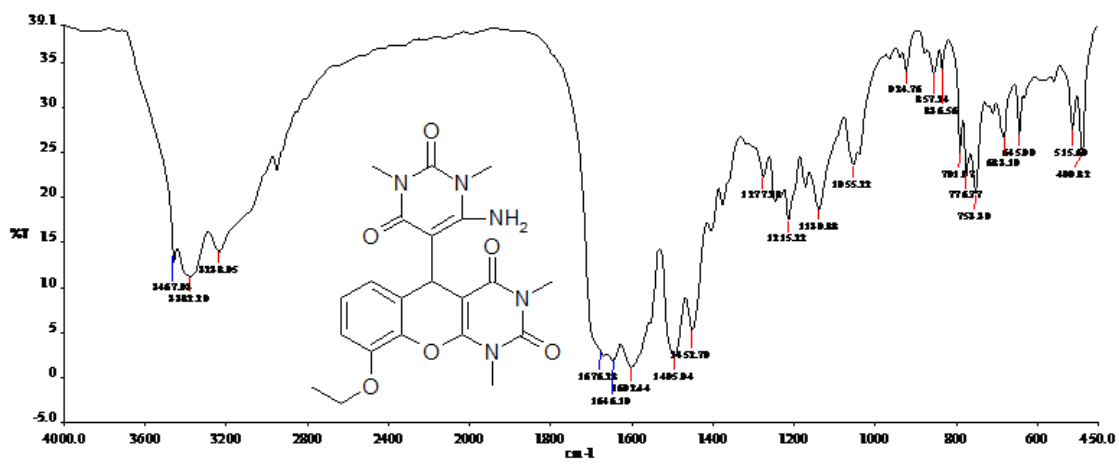

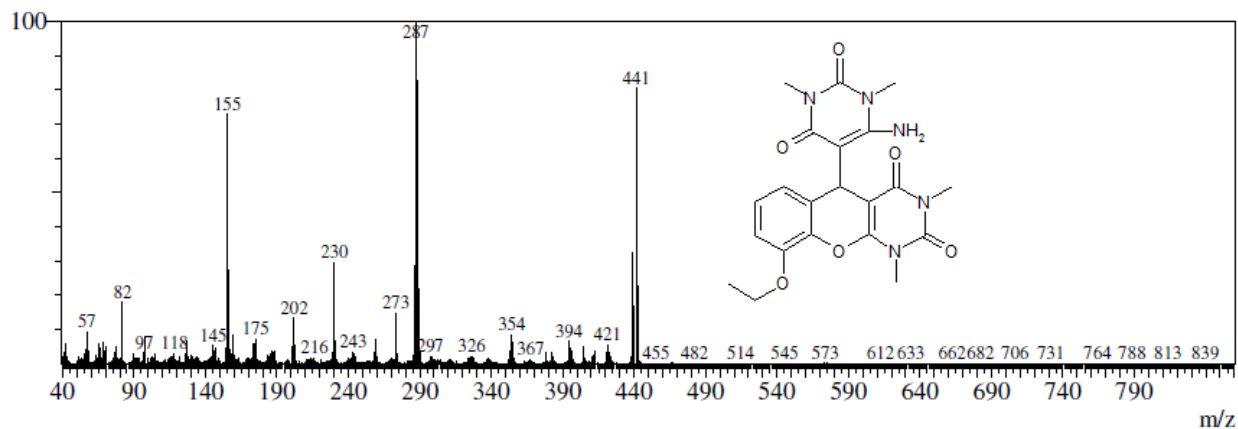

**Entry d, Table 3:** 5-(6-amino-1,3-dimethyl-2,4-dioxo-1,2,3,4-tetrahydropyrimidin-5-yl)-9-hydroxy-1,3-dimethyl-1,5-dihydro-2H-chromeno[2,3-d]pyrimidine-2,4(3H)-dione

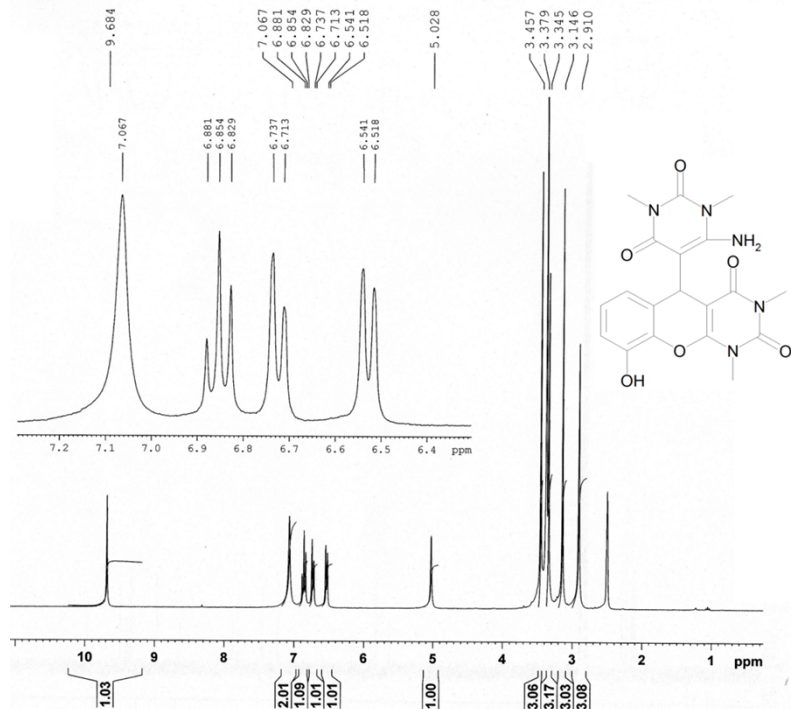

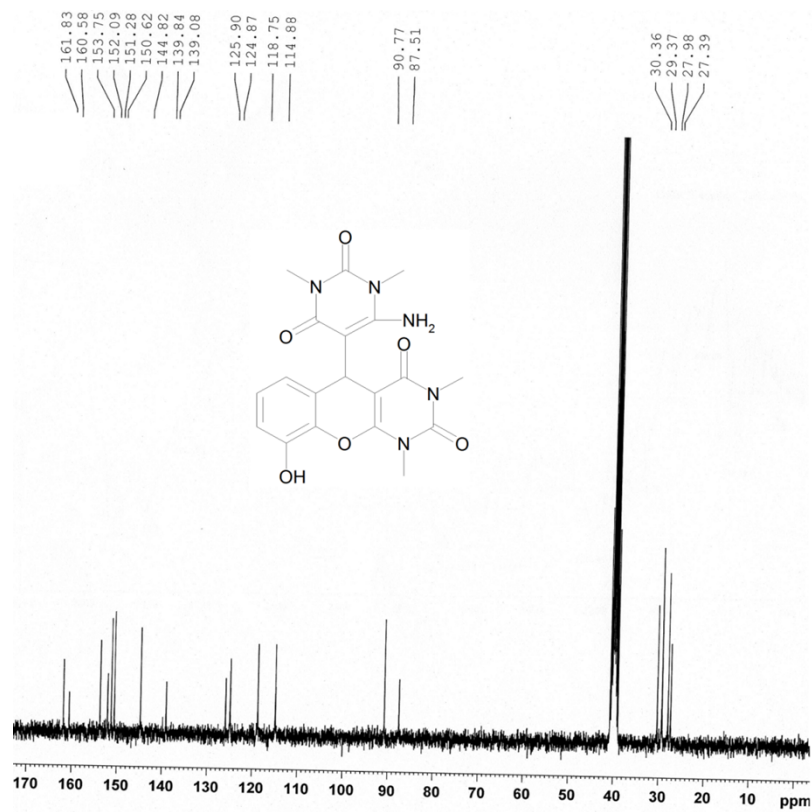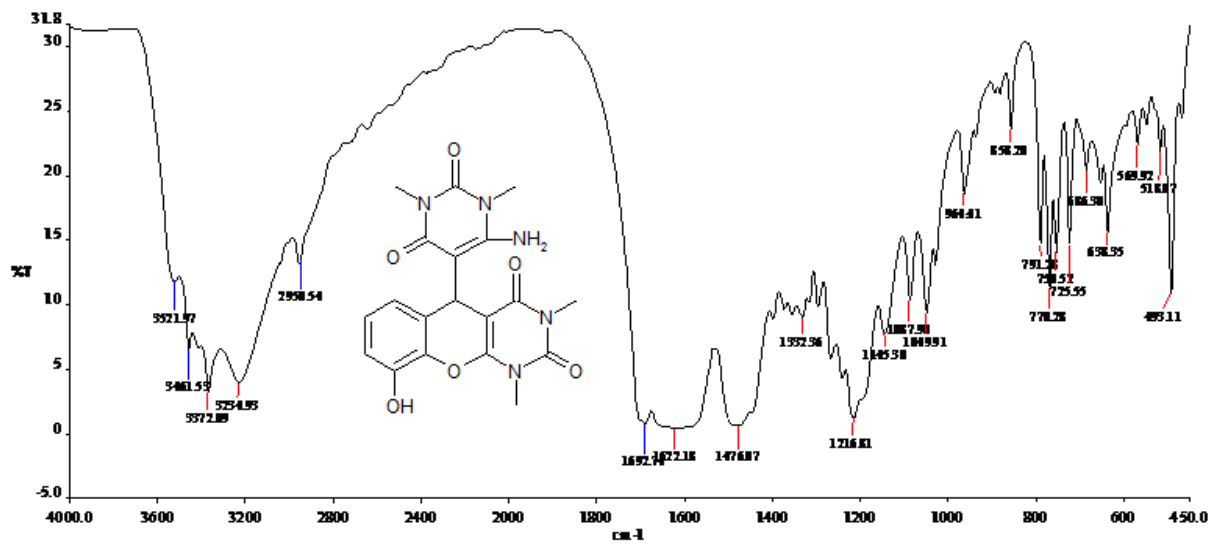



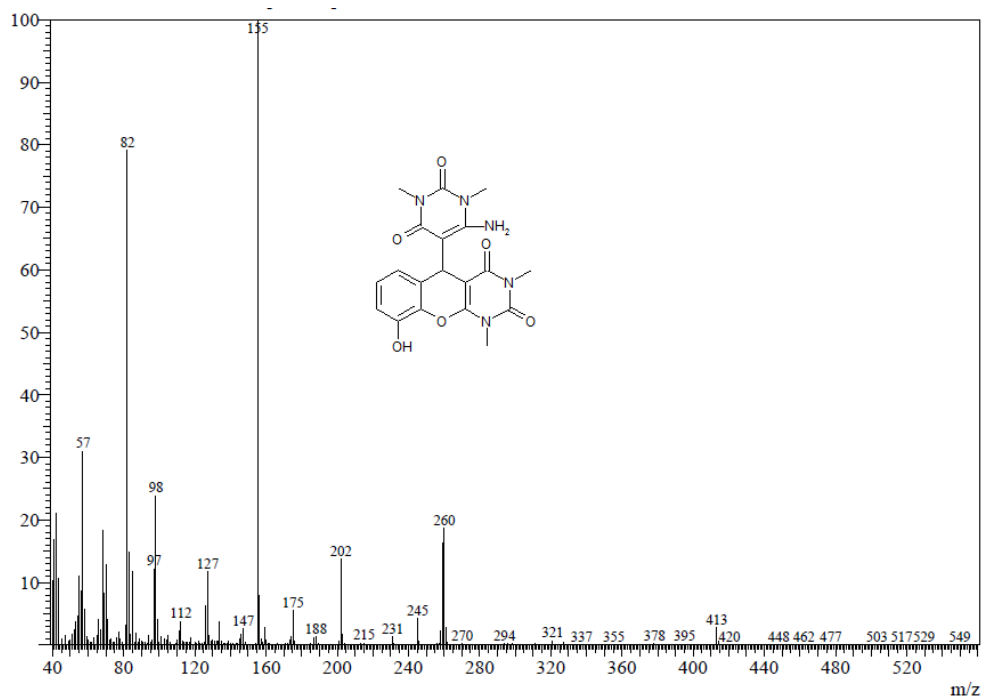

**Entry e, Table 3:** 5-(6-amino-1,3-dimethyl-2,4-dioxo-1,2,3,4-tetrahydropyrimidin-5-yl)-8-hydroxy-1,3-dimethyl-1,5-dihydro-2H-chromeno[2,3-*d*]pyrimidine-2,4(3H)-dione

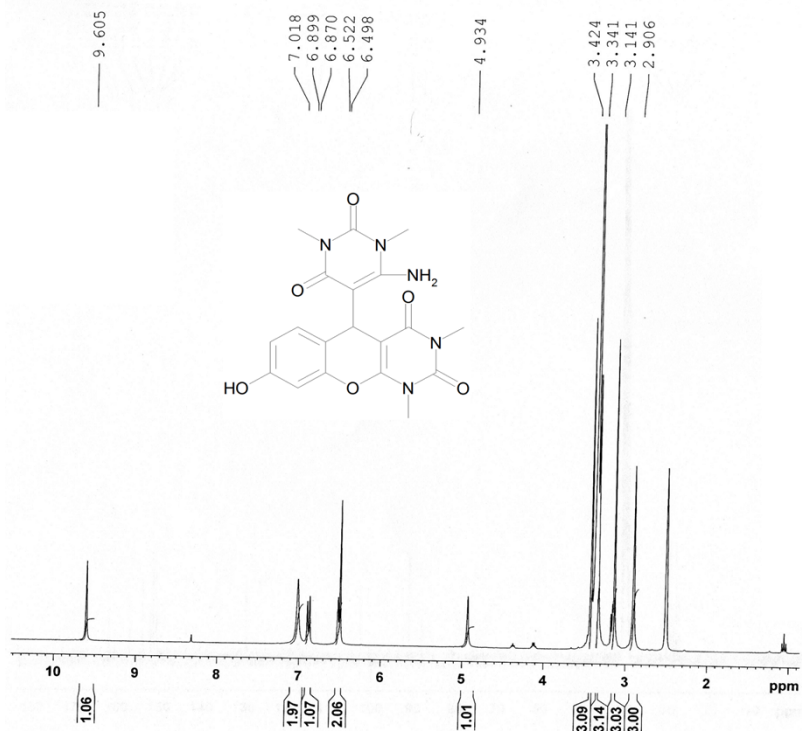

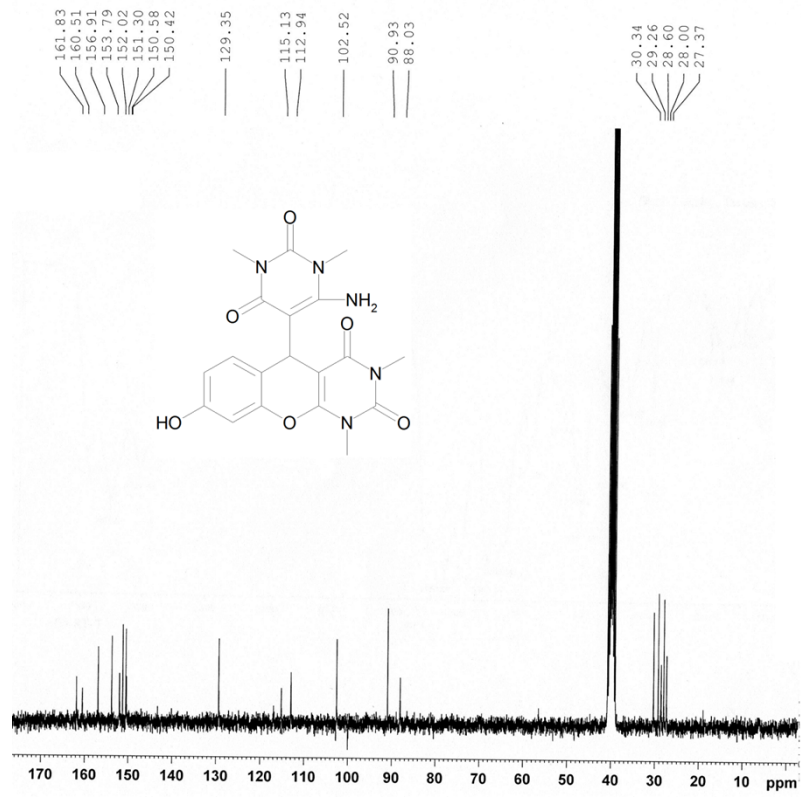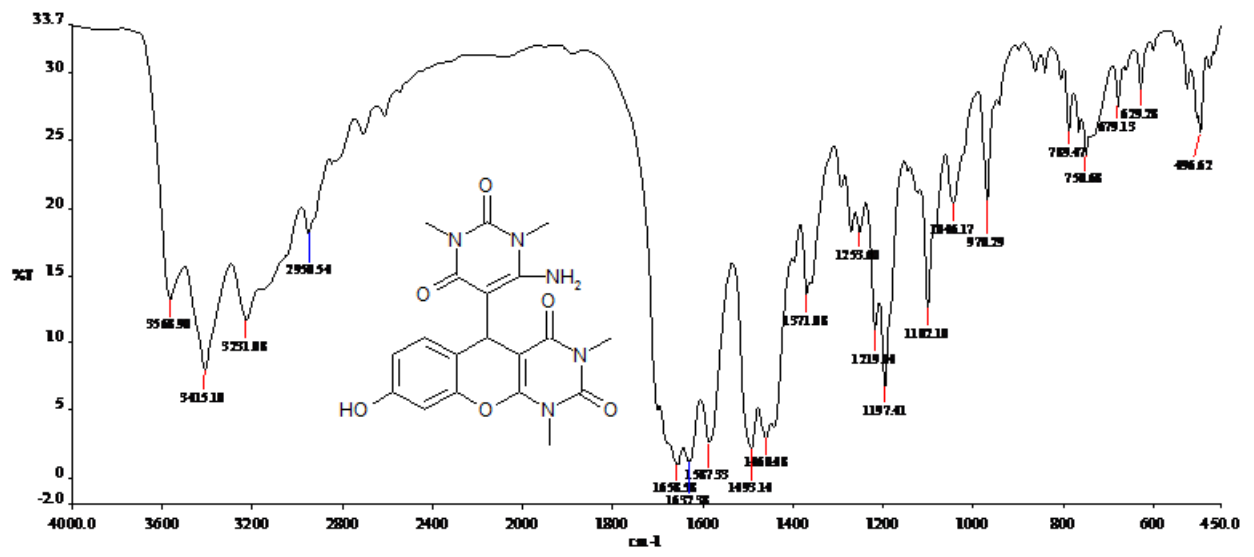

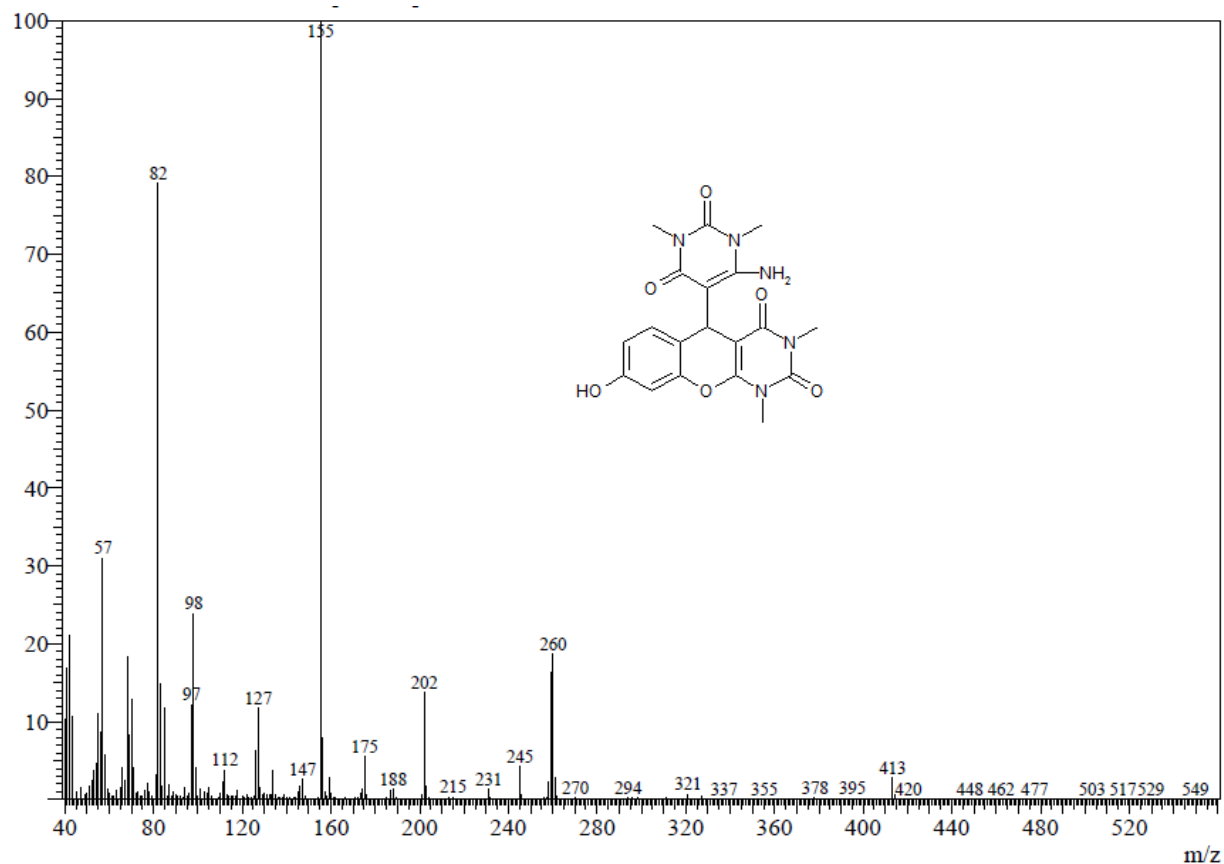

**Entry f, Table 3:** 5-(6-amino-1,3-dimethyl-2,4-dioxo-1,2,3,4-tetrahydropyrimidin-5-yl)-7-hydroxy-1,3-dimethyl-1,5-dihydro-2H-chromeno[2,3-d]pyrimidine-2,4(3H)-dione

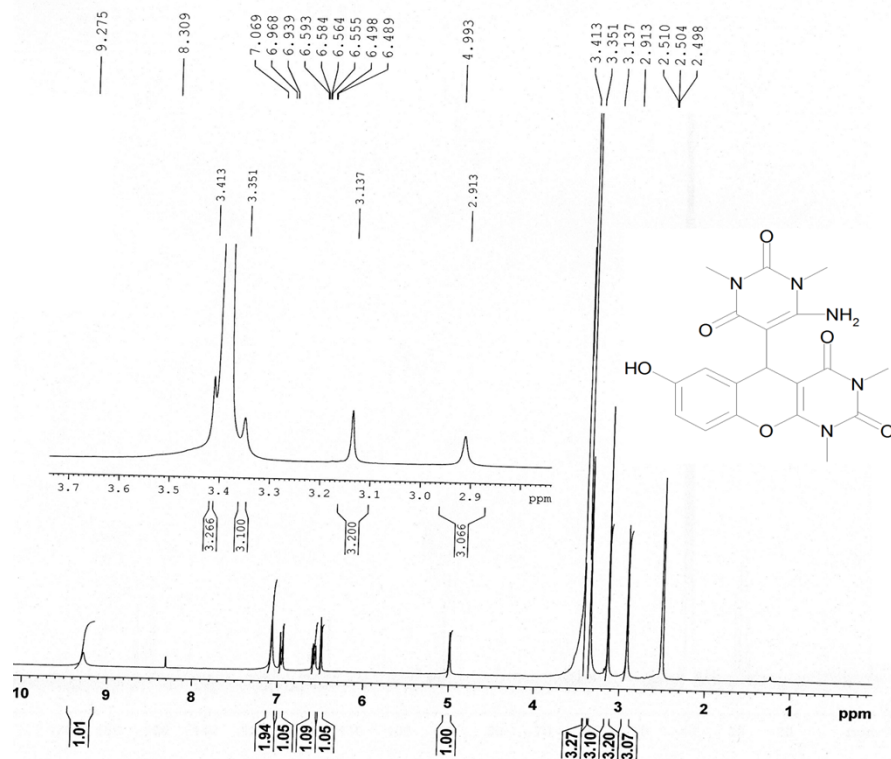

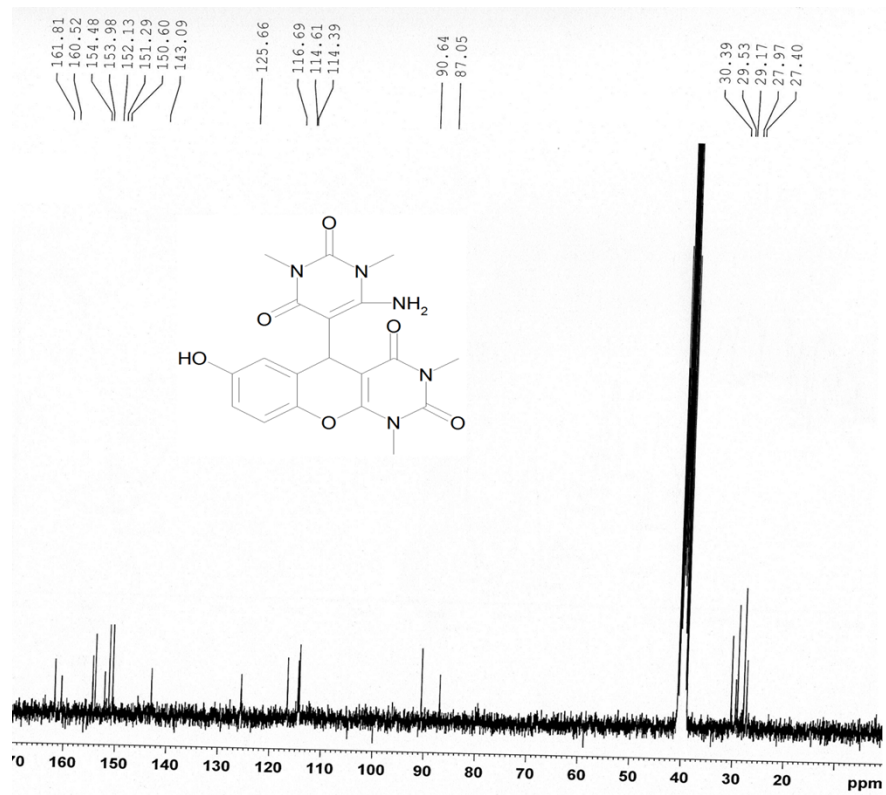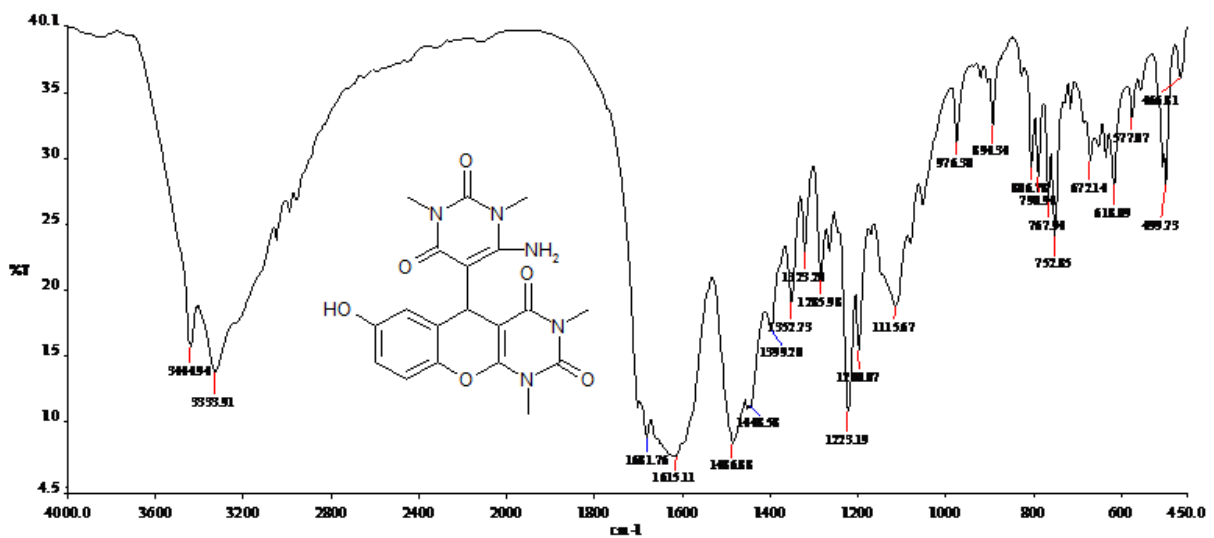

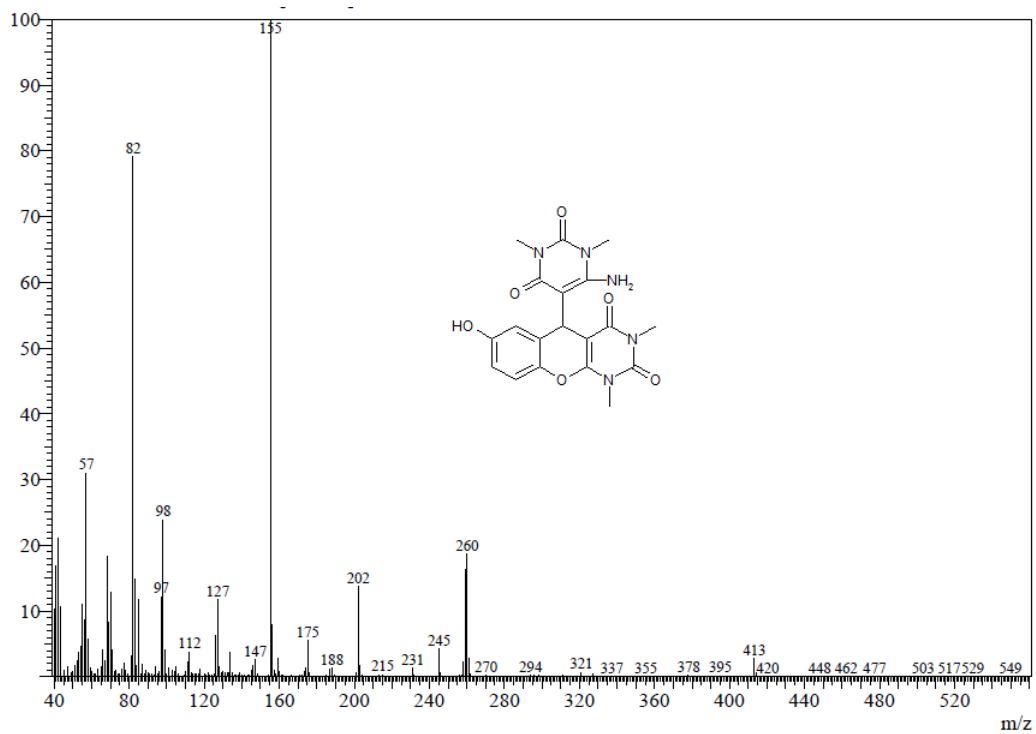

**Entry g, Table 3:** 5-(6-amino-1,3-dimethyl-2,4-dioxo-1,2,3,4-tetrahydropyrimidin-5-yl)-8,9-dihydroxy-1,3-dimethyl-1,5-dihydro-2H-chromeno[2,3-d]pyrimidine-2,4(3H)-dione

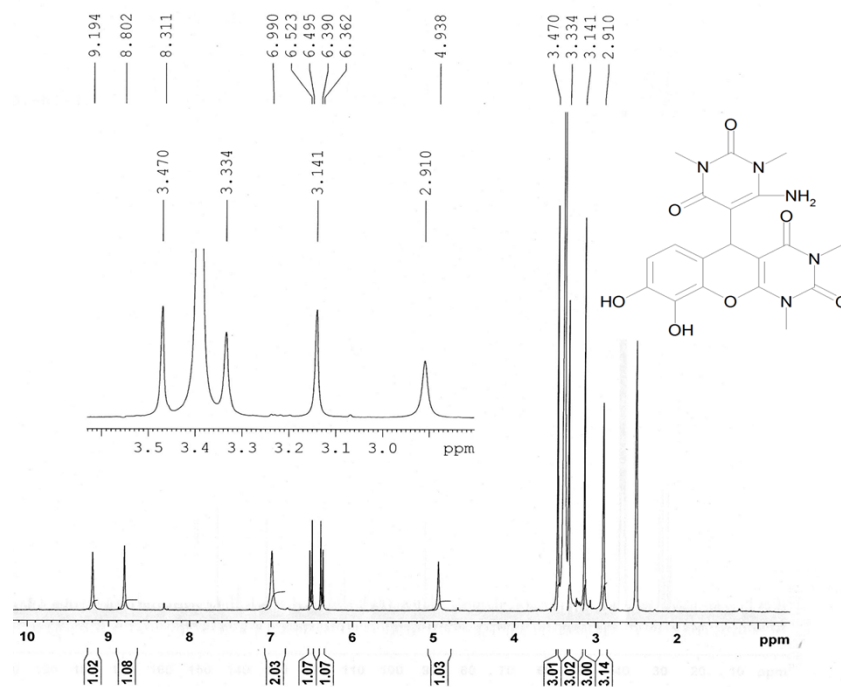

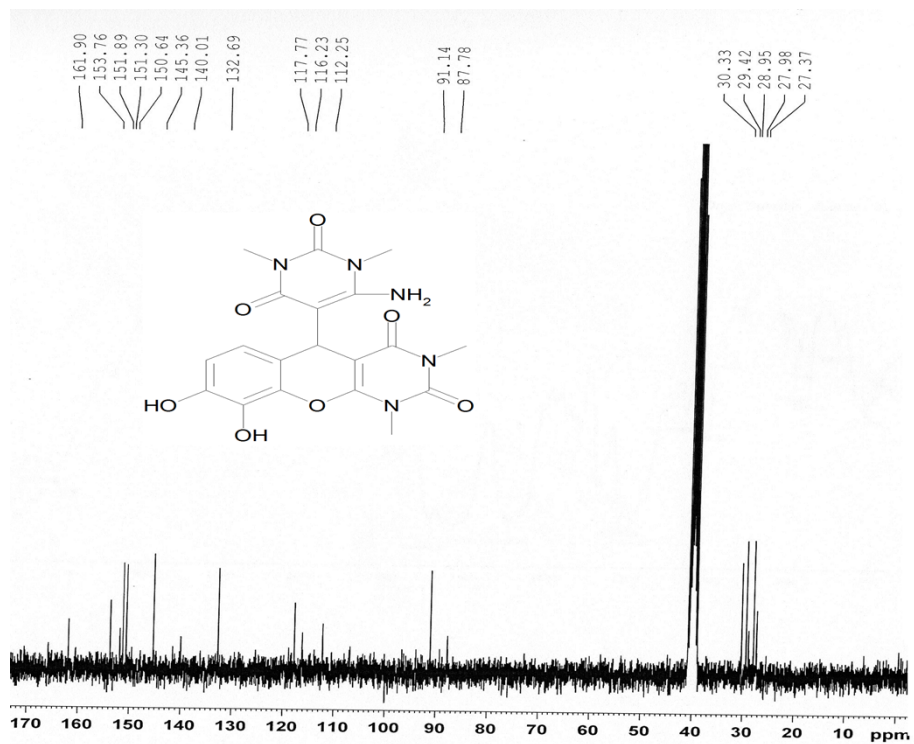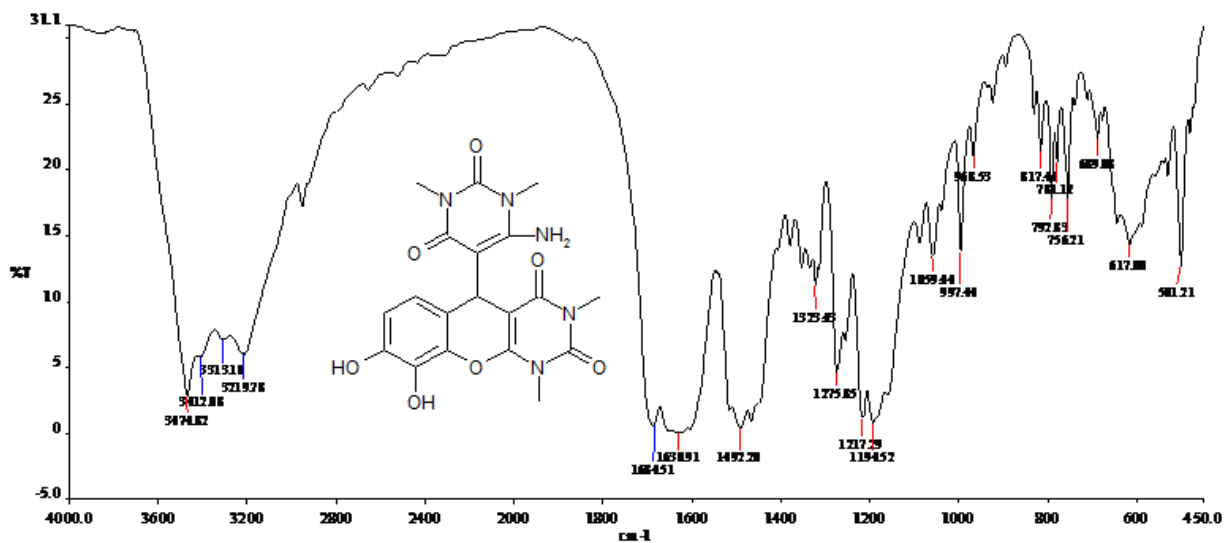

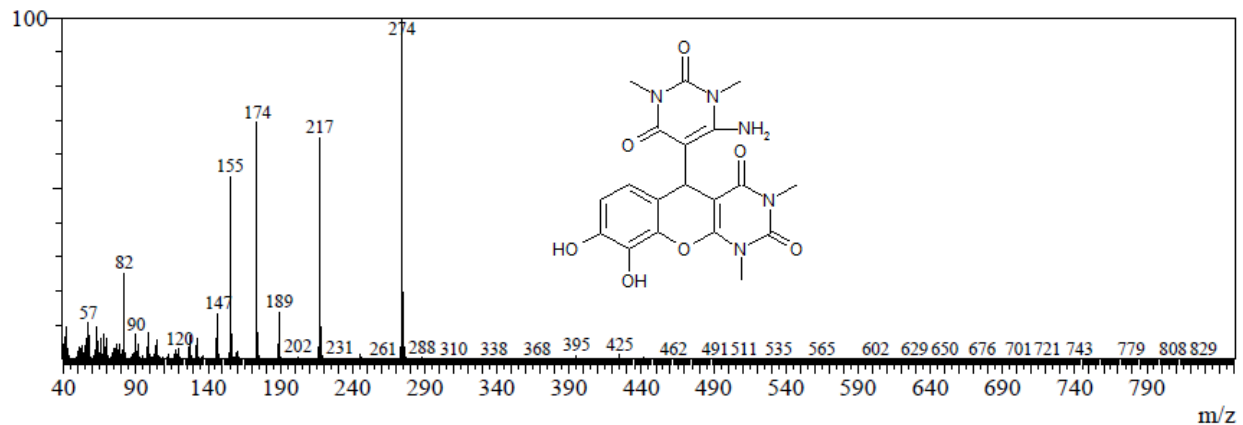

**Entry h, Table 3:** 5-(6-amino-1,3-dimethyl-2,4-dioxo-1,2,3,4-tetrahydropyrimidin-5-yl)-7-chloro-1,3-dimethyl-1,5-dihydro-2*H*-chromeno[2,3-*d*]pyrimidine-2,4(3*H*)-dione

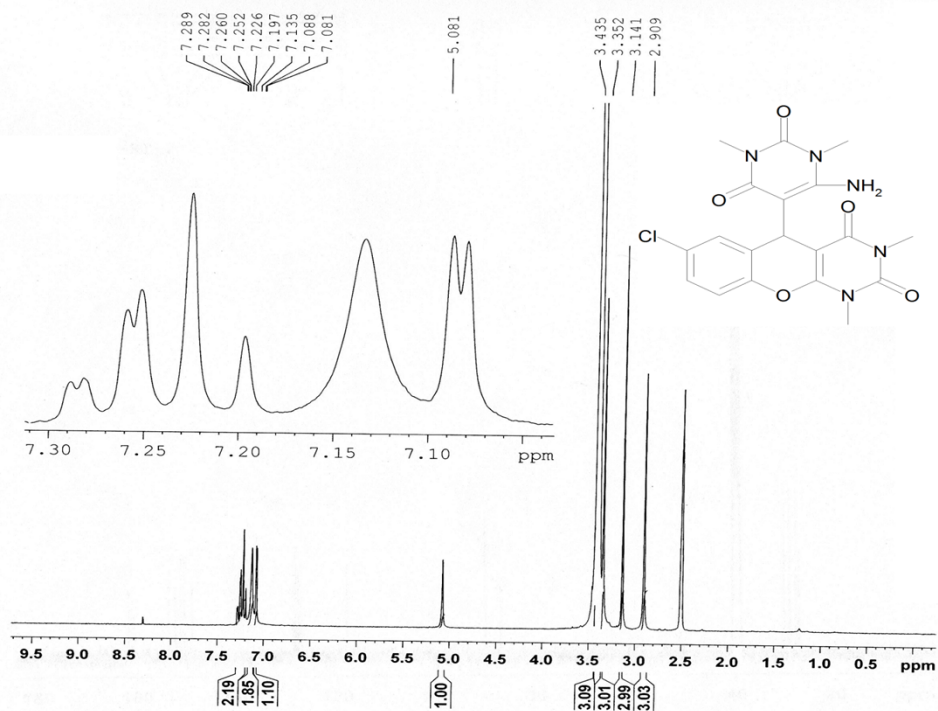

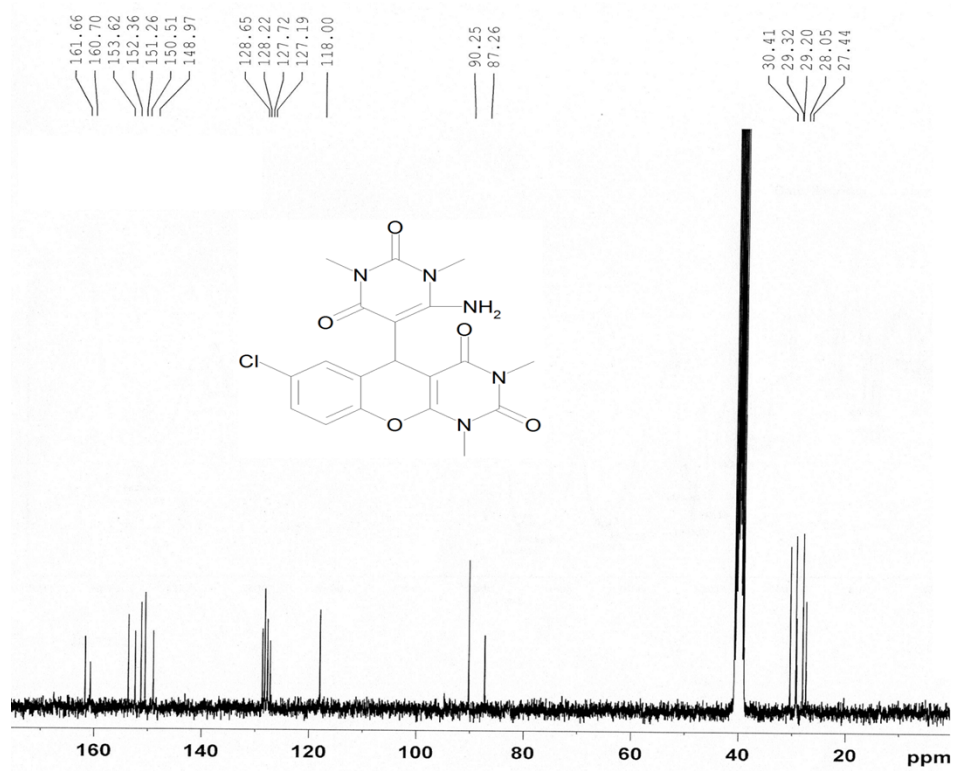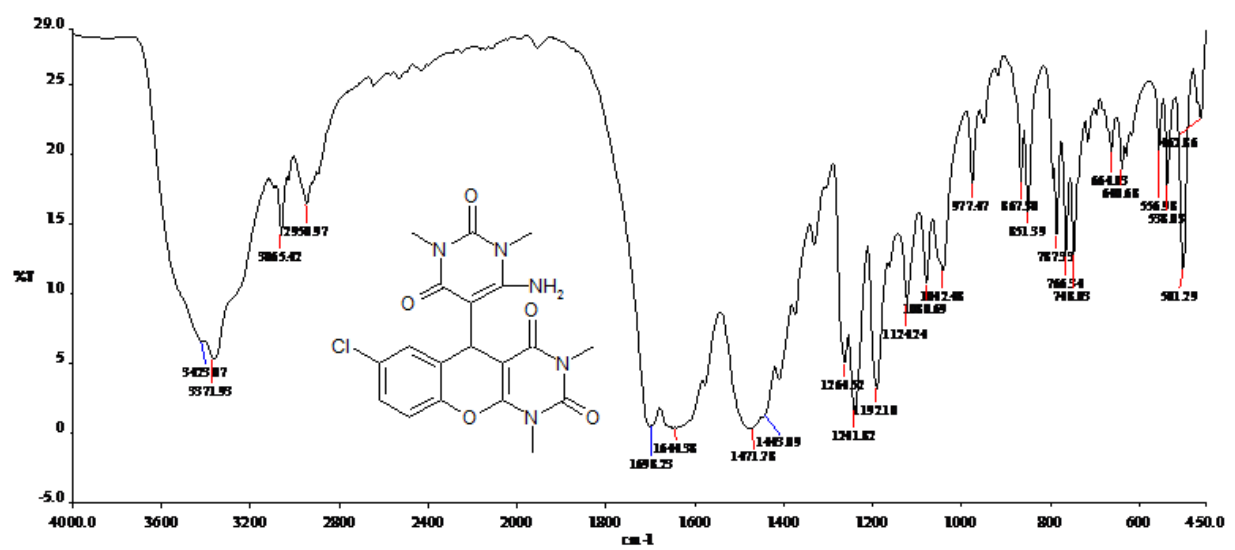



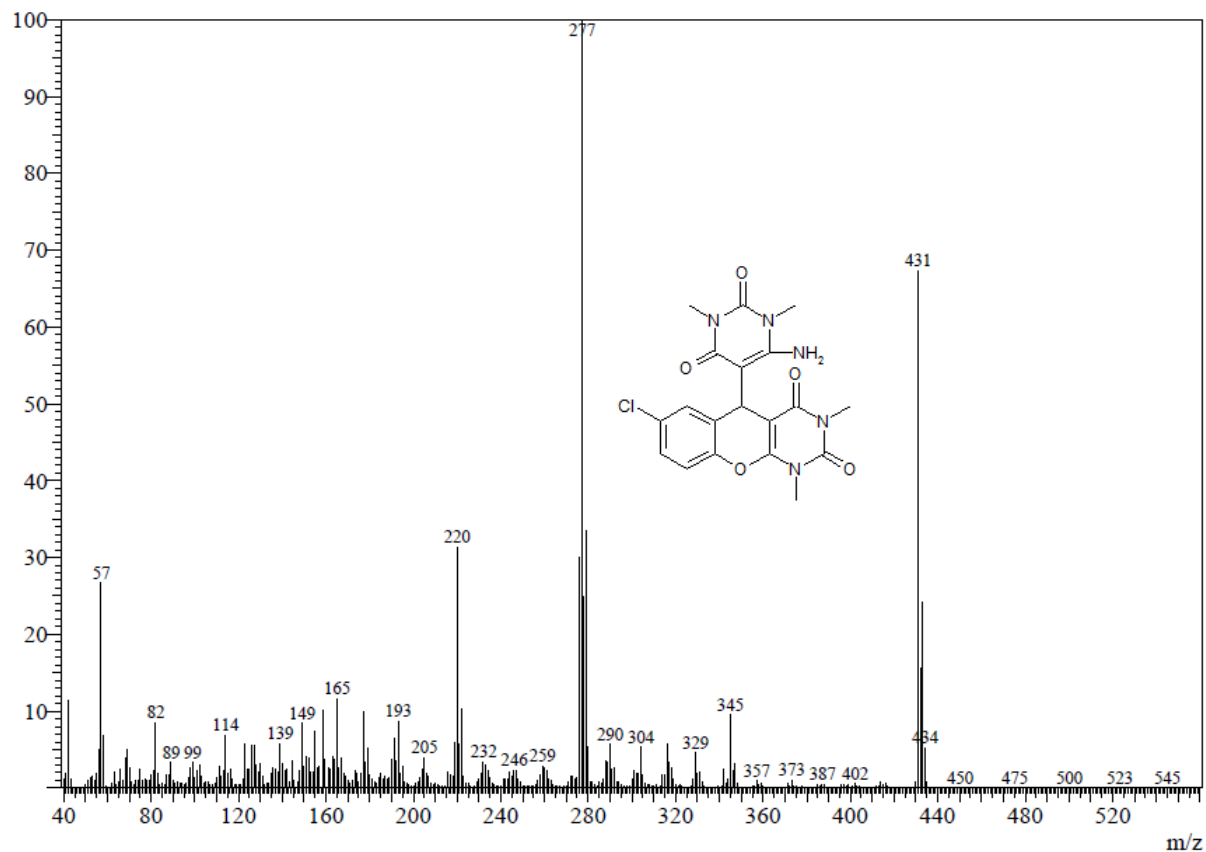

**Entry i, Table 3:** 5-(6-amino-1,3-dimethyl-2,4-dioxo-1,2,3,4-tetrahydropyrimidin-5-yl)-7-bromo-1,3-dimethyl-1,5-dihydro-2H-chromeno[2,3-d]pyrimidine-2,4(3H)-dione

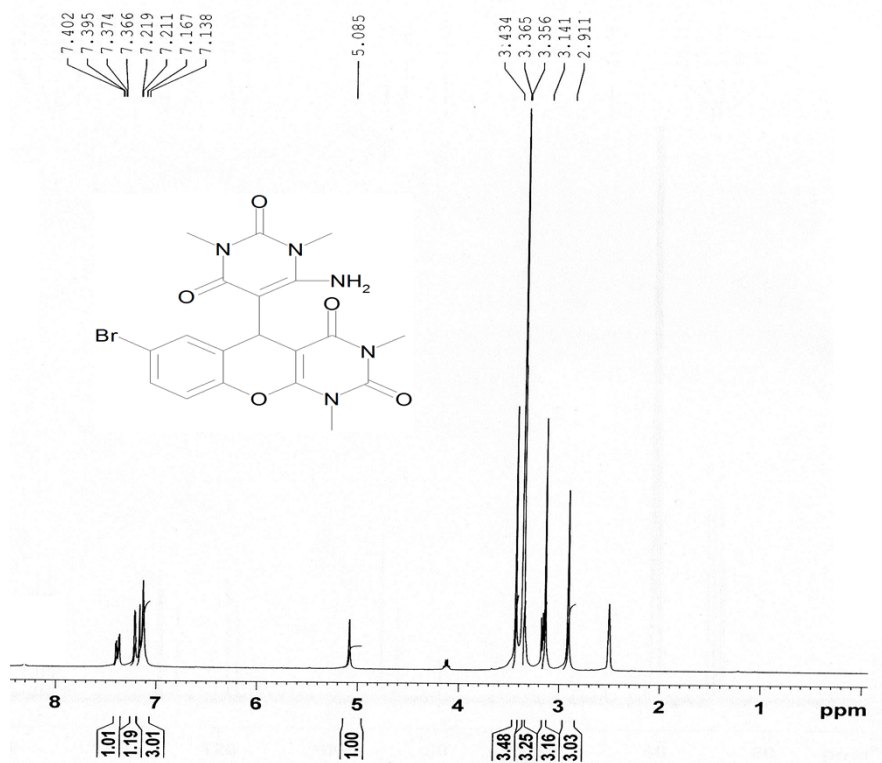

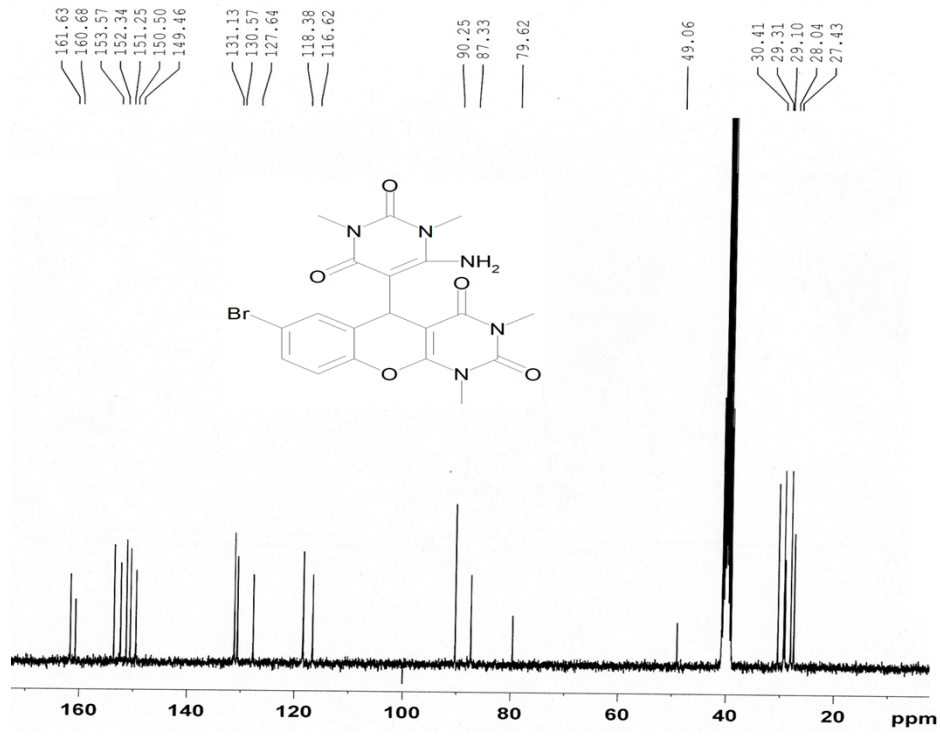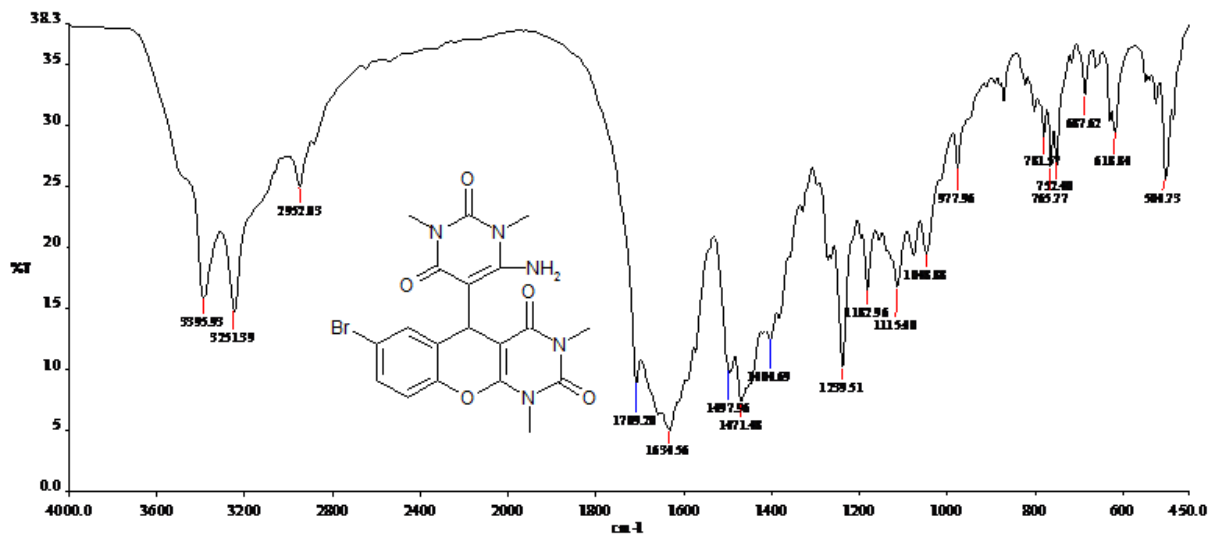

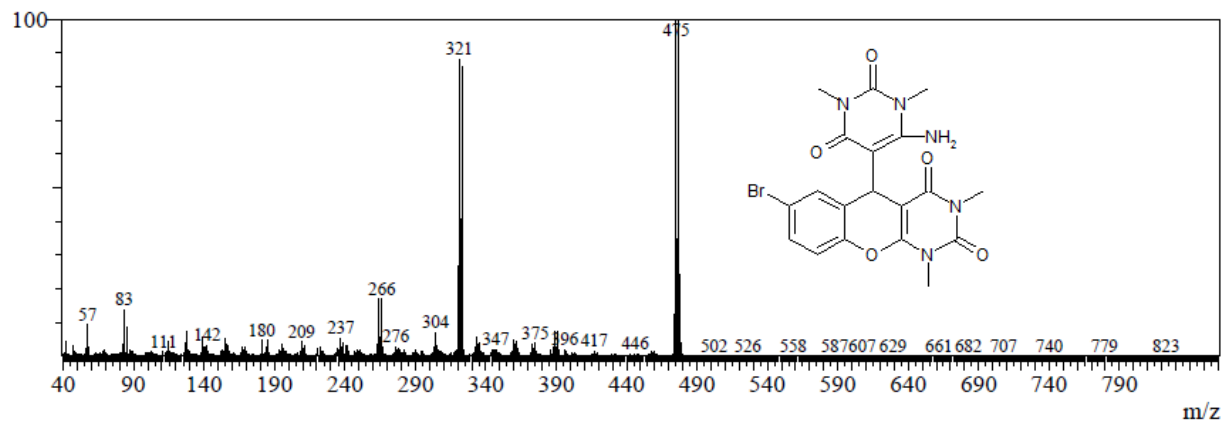

**Entry j, Table 3:** 5-(6-amino-1,3-dimethyl-2,4-dioxo-1,2,3,4-tetrahydropyrimidin-5-yl)-1,3-dimethyl-7-nitro-1,5-dihydro-2H-chromeno[2,3-d]pyrimidine-2,4(3H)-dione

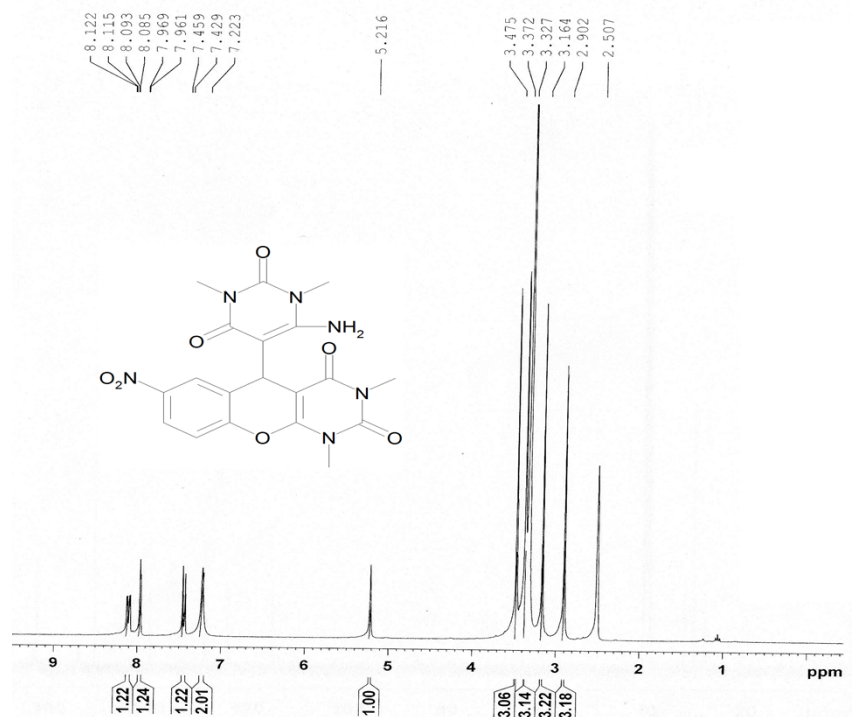

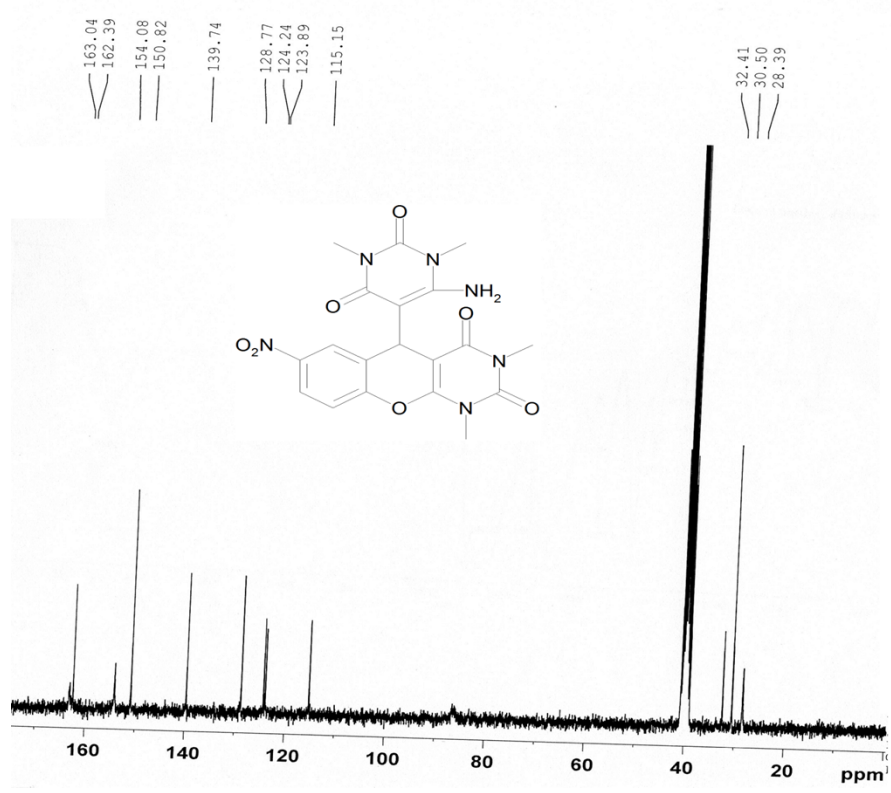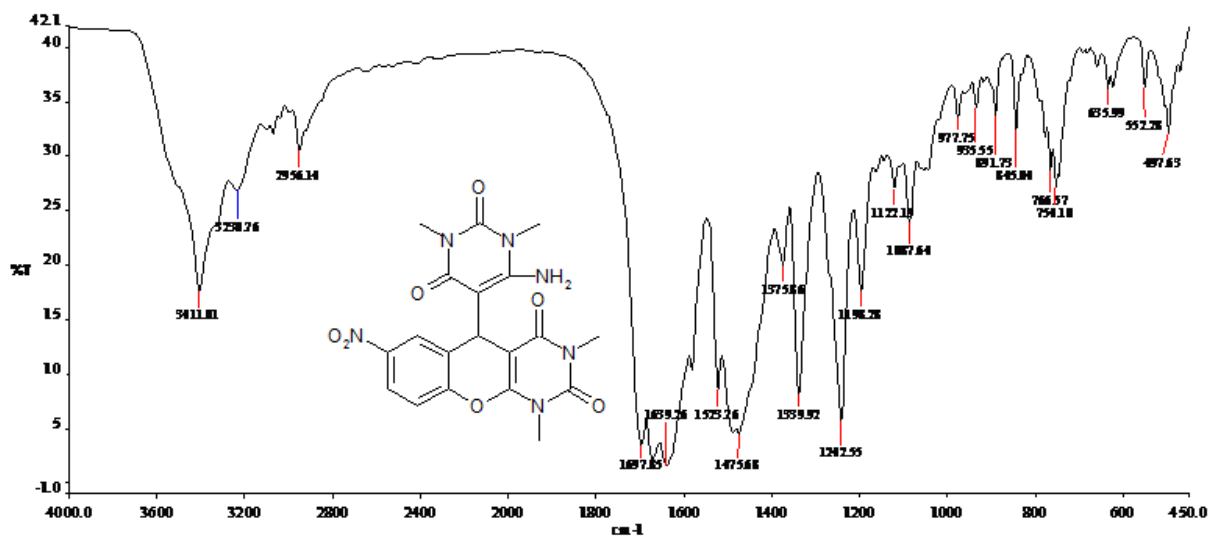

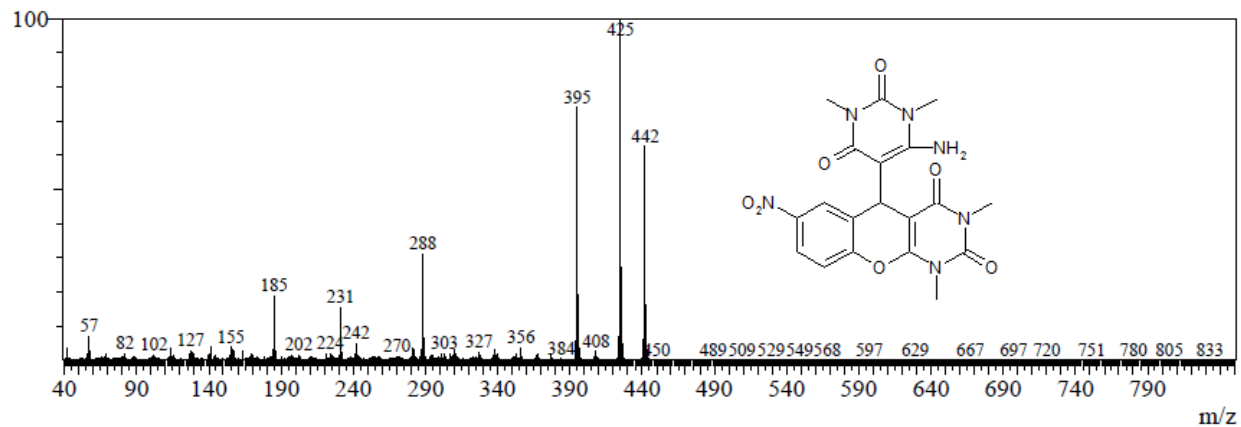

Entry k, Table 3:

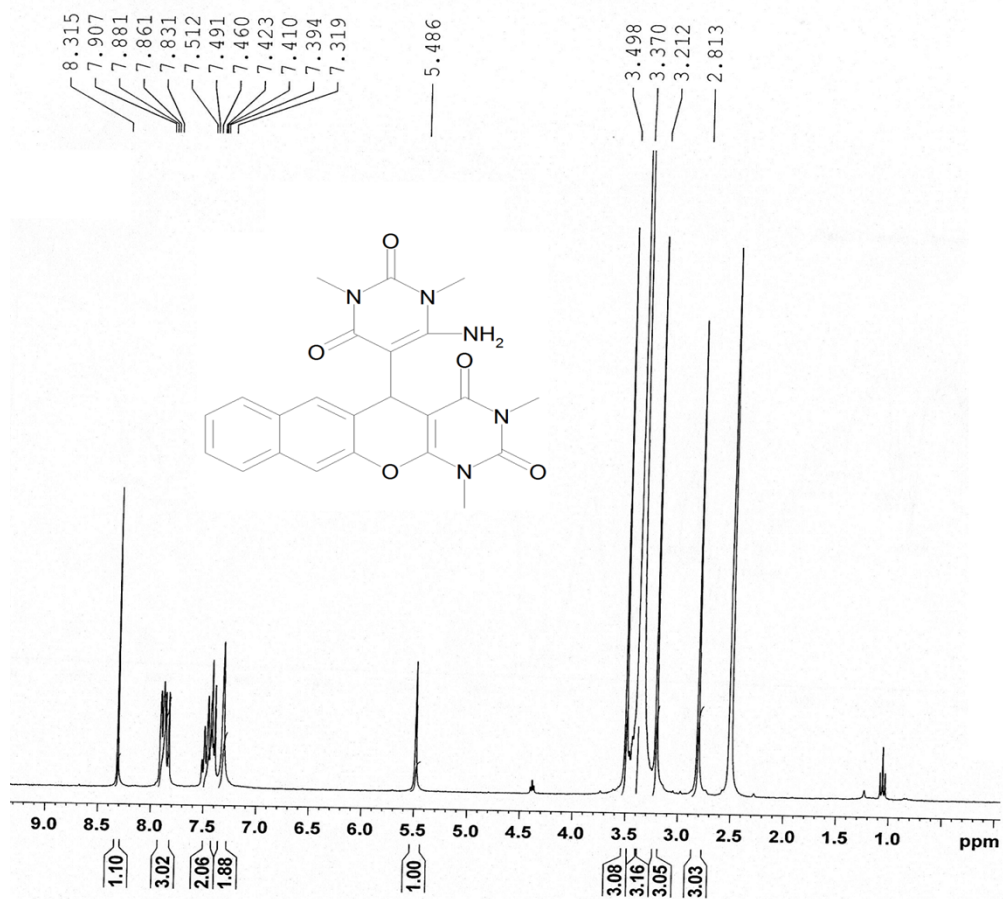

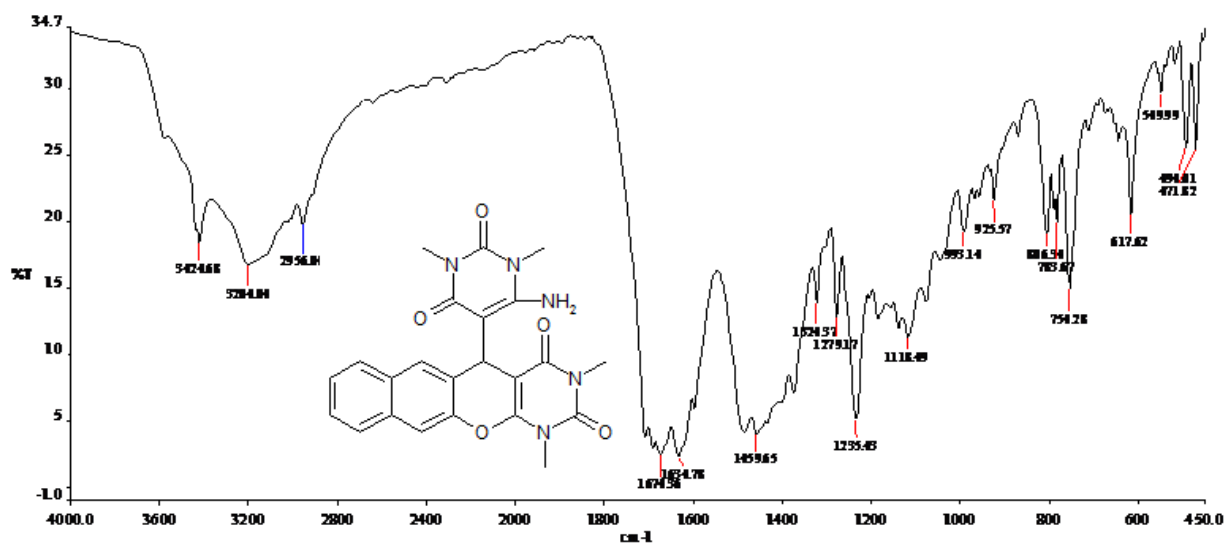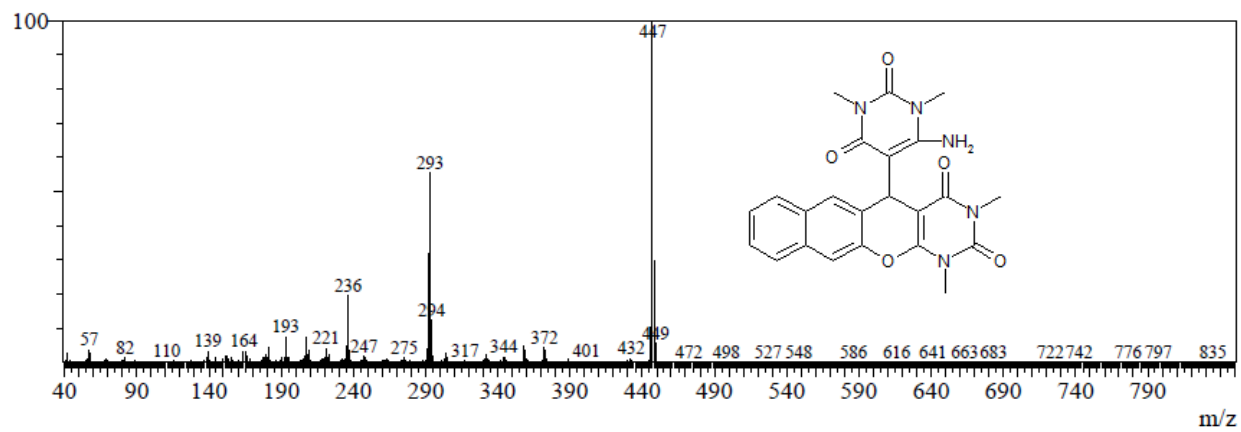

**<sup>1</sup>H NMR, <sup>13</sup>C NMR, IR and MS (EI) spectra of Synthesized Pyranopyrimidinetrione products**

**Entry a, Table 4:** 5-(1,3-dimethyl-2,4-dioxo-1,3,4,5-tetrahydro-2*H*-chromeno[2,3-*d*]pyrimidin-5-yl)-1,3-dimethylpyrimidine-2,4,6(1*H*,3*H*,5*H*)-trione

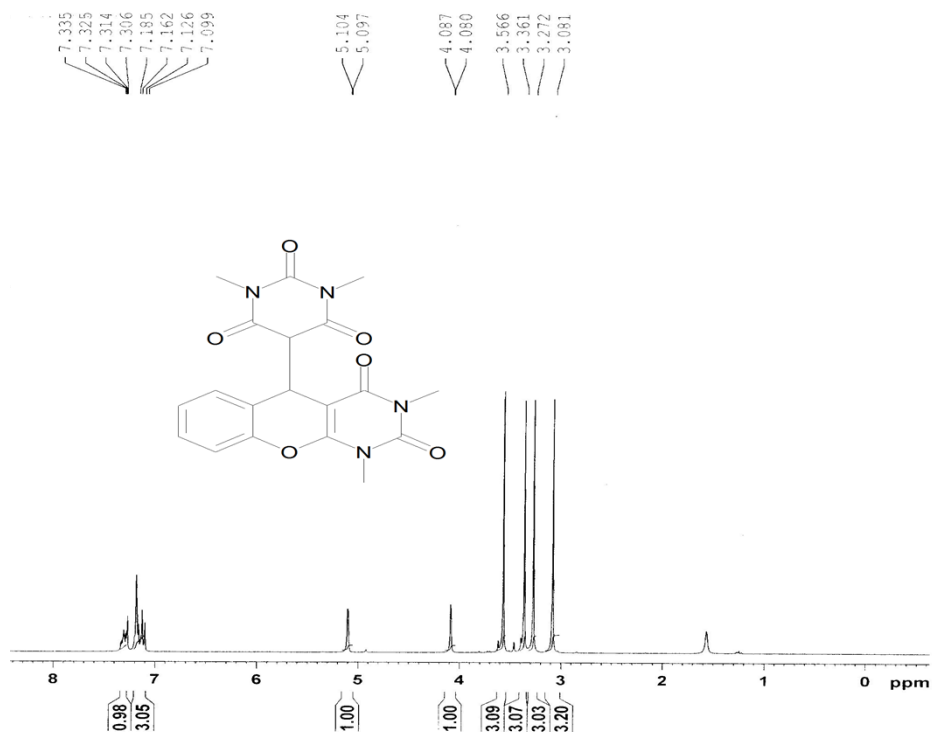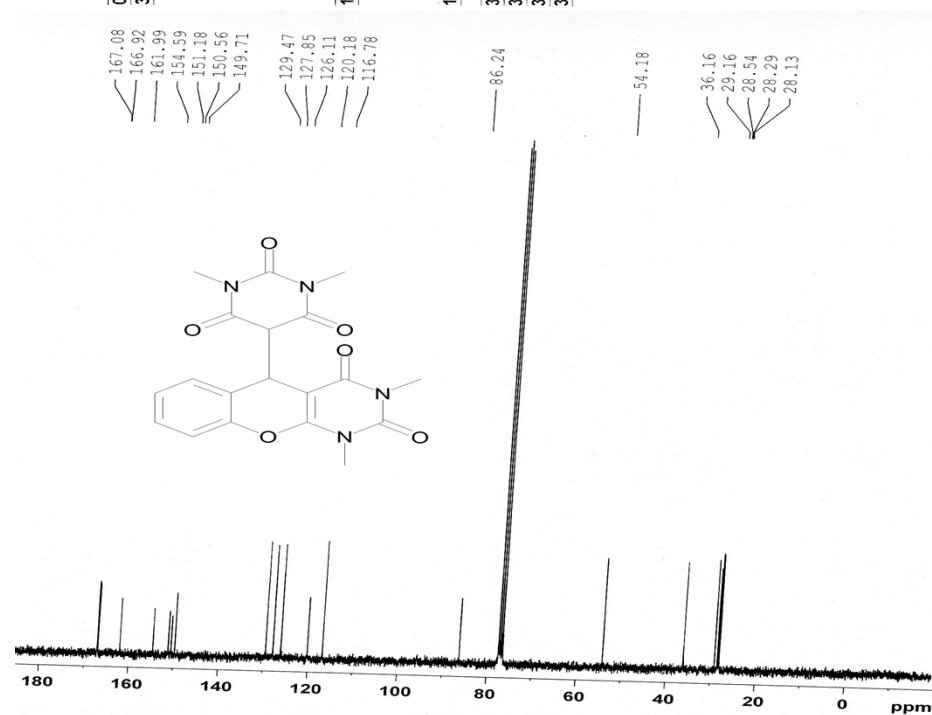

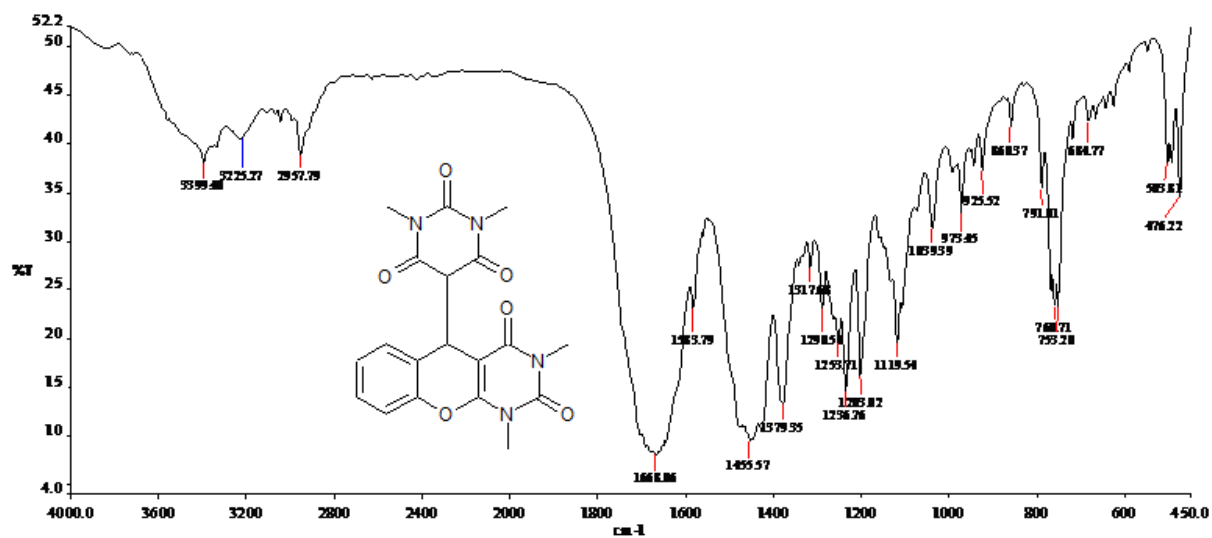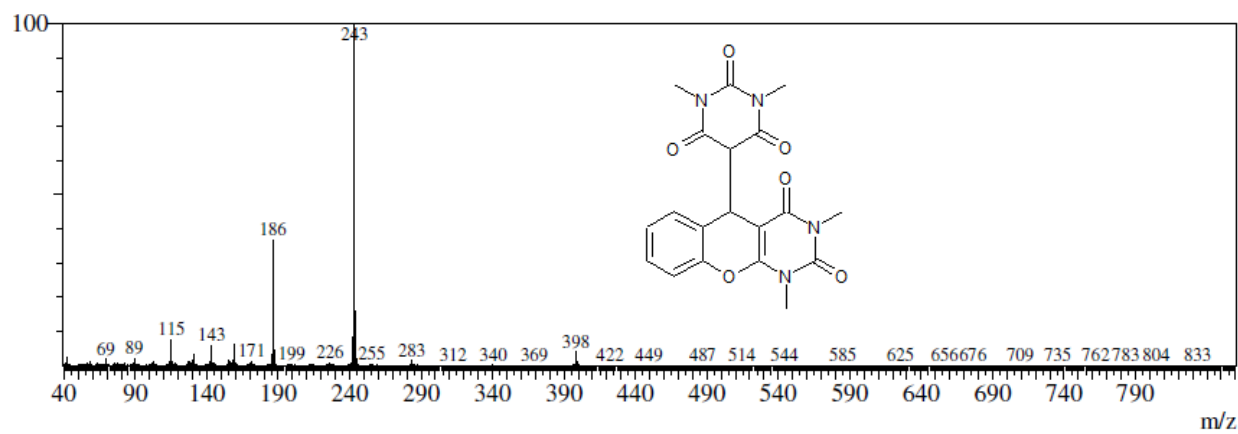



**Entry b, Table 4:** 5-(7-methoxy-1,3-dimethyl-2,4-dioxo-1,3,4,5-tetrahydro-2*H*-chromeno[2,3-*d*]pyrimidin-5-yl)-1,3-dimethylpyrimidine-2,4,6(1*H*,3*H*,5*H*)-trione

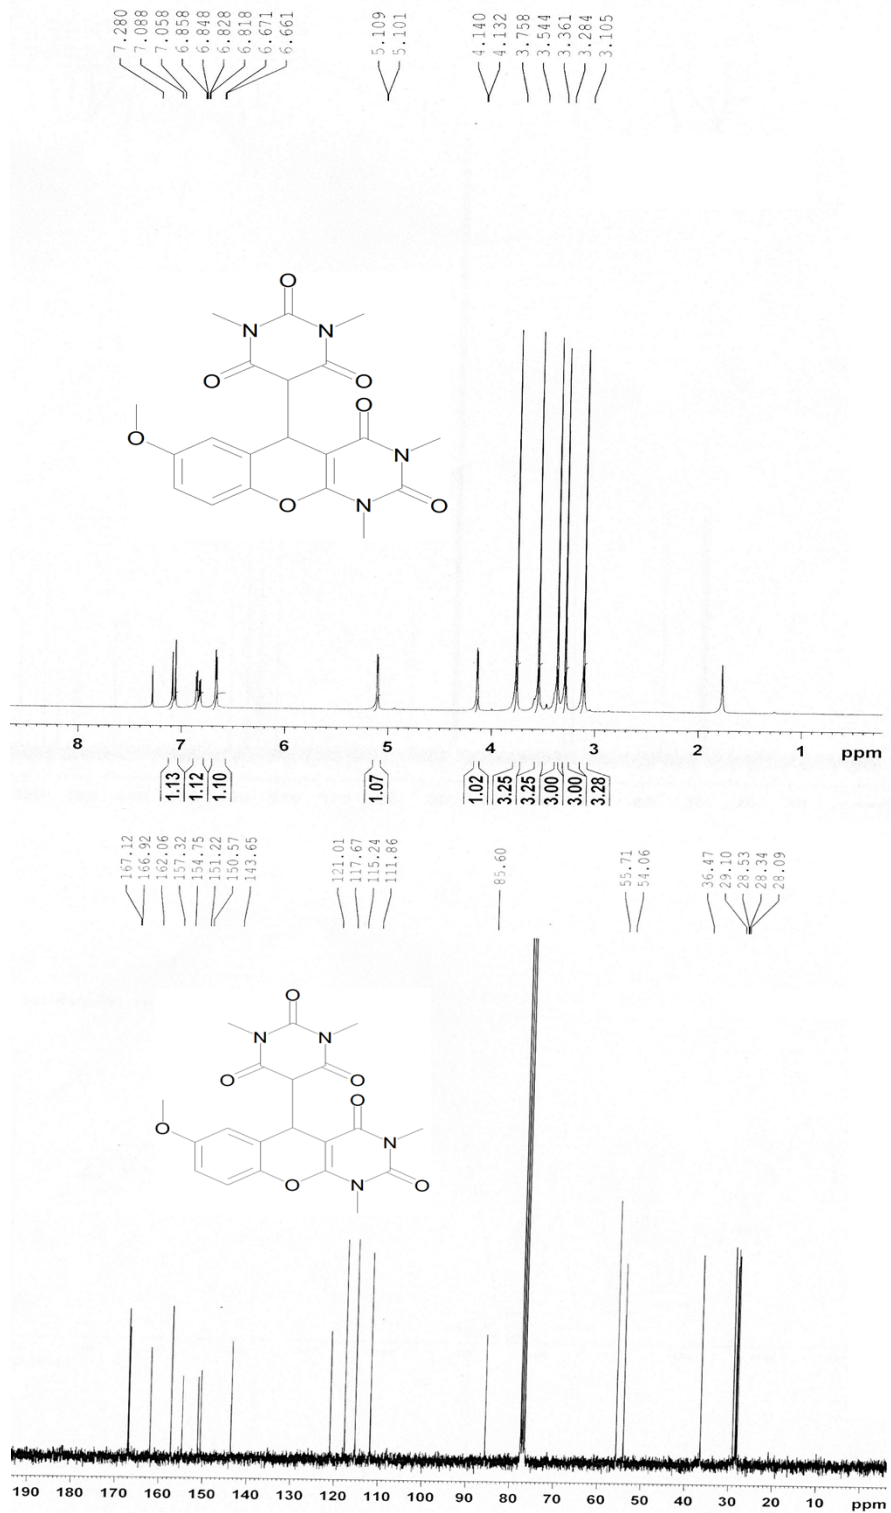

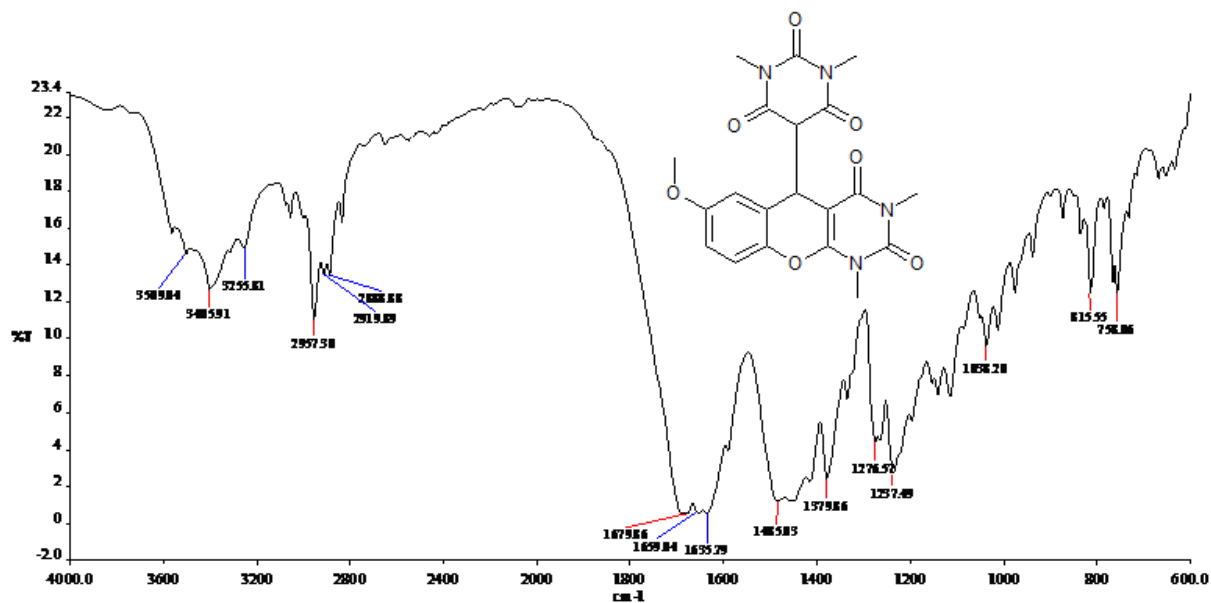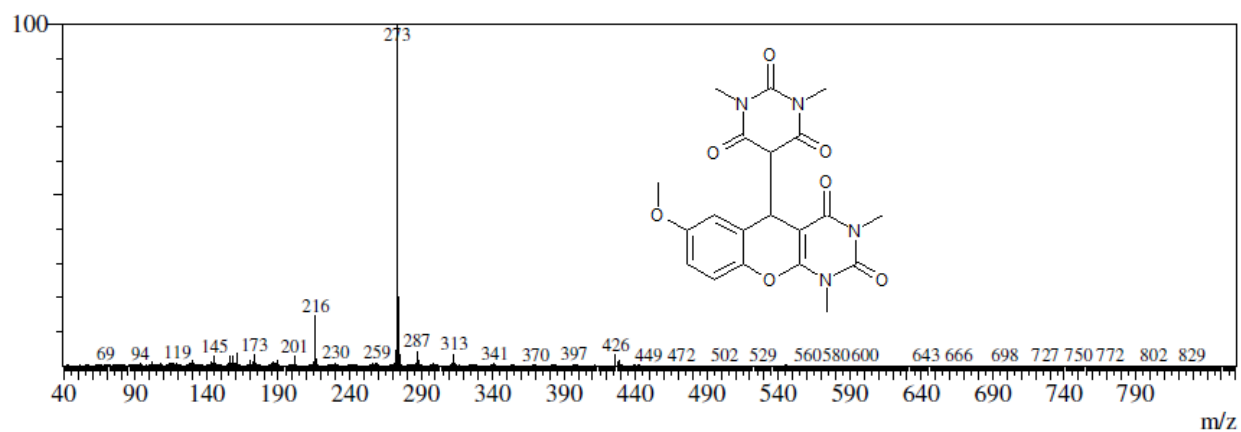

**Entry c, Table 4:** 5-(7-ethoxy-1,3-dimethyl-2,4-dioxo-1,3,4,5-tetrahydro-2H-chromeno[2,3-d]pyrimidin-5-yl)-1,3-dimethylpyrimidine-2,4,6(1H,3H,5H)-trione

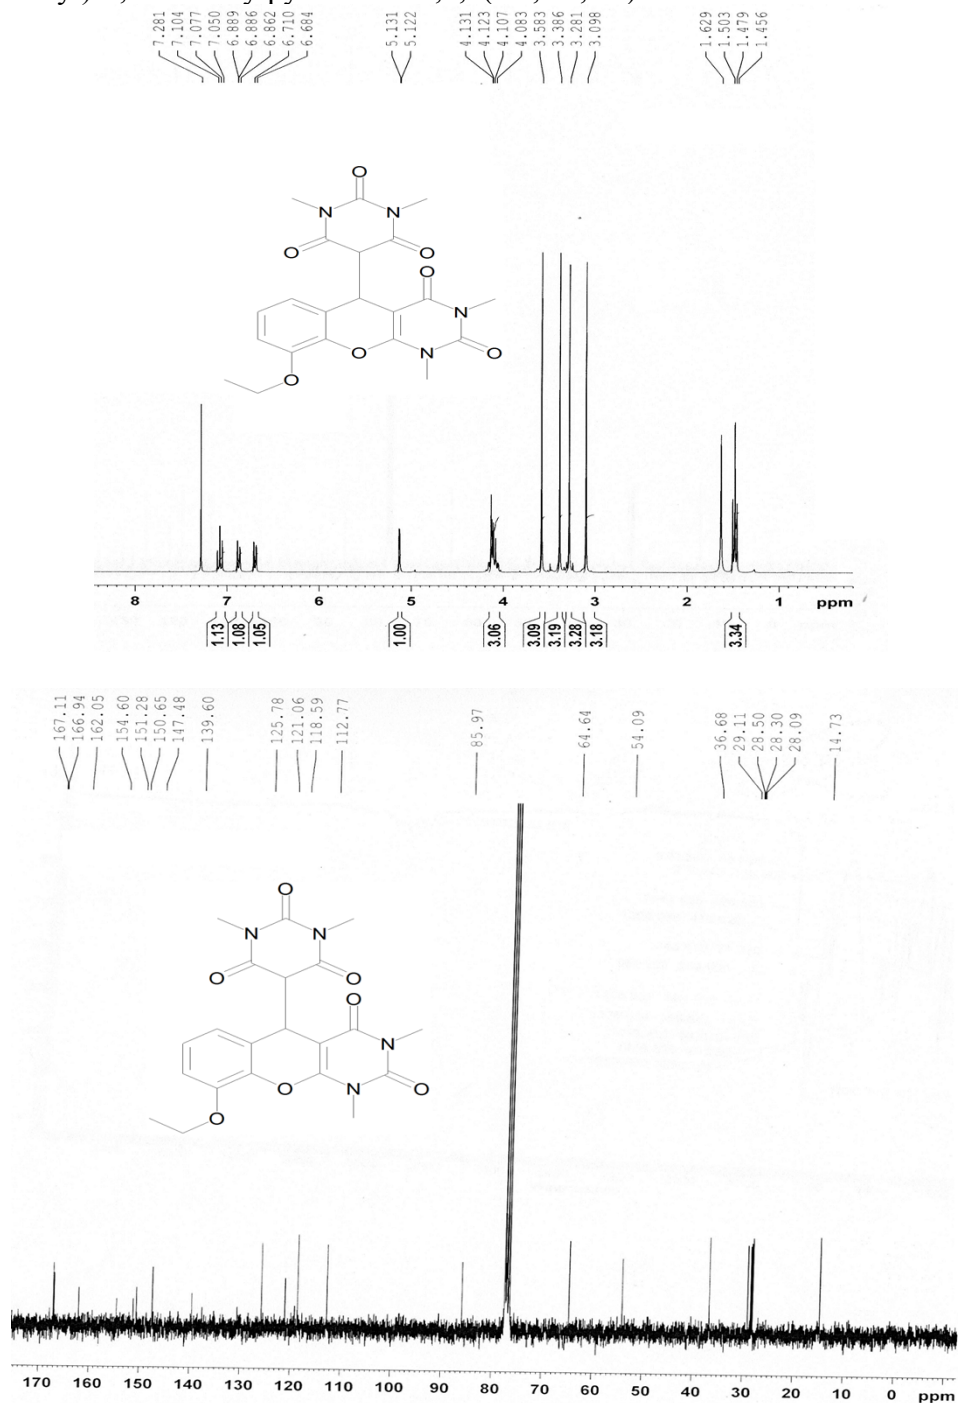

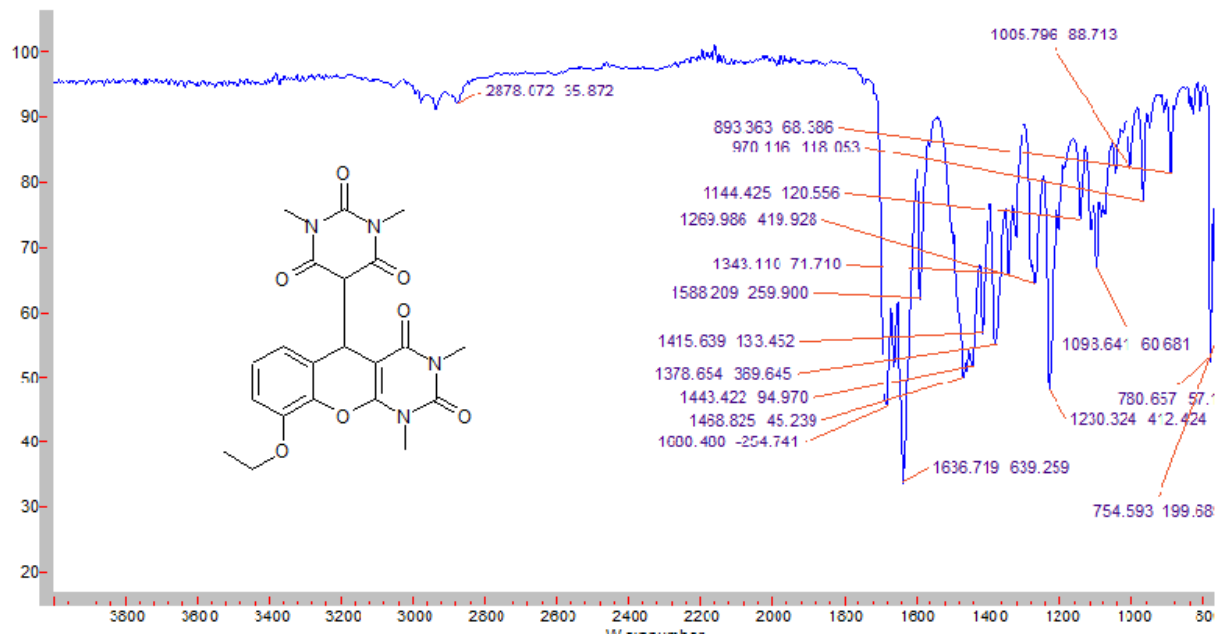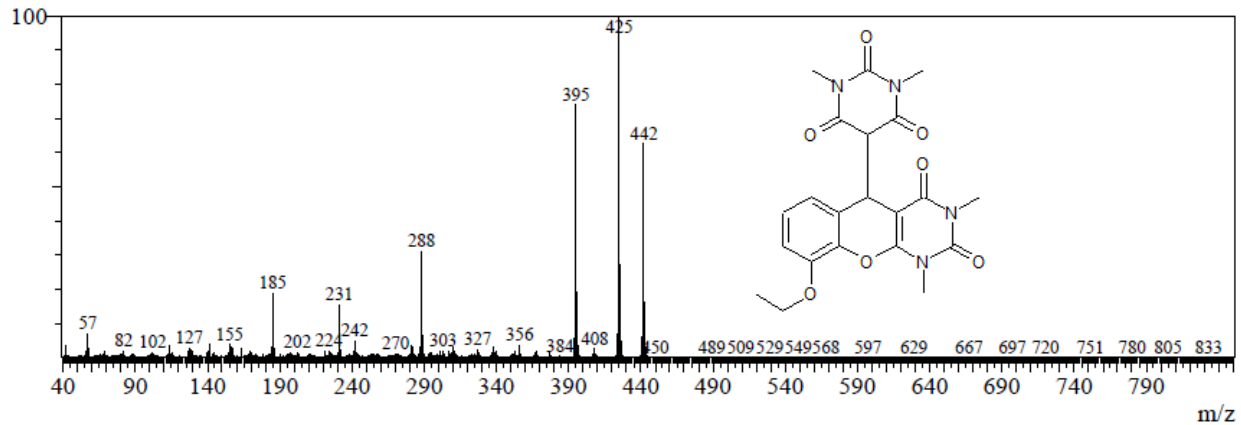

**Entry d, Table 4:** 5-(7-hydroxy-1,3-dimethyl-2,4-dioxo-1,3,4,5-tetrahydro-2H-chromeno[2,3-d]pyrimidin-5-yl)-1,3-dimethylpyrimidine-2,4,6(1H,3H,5H)-trione

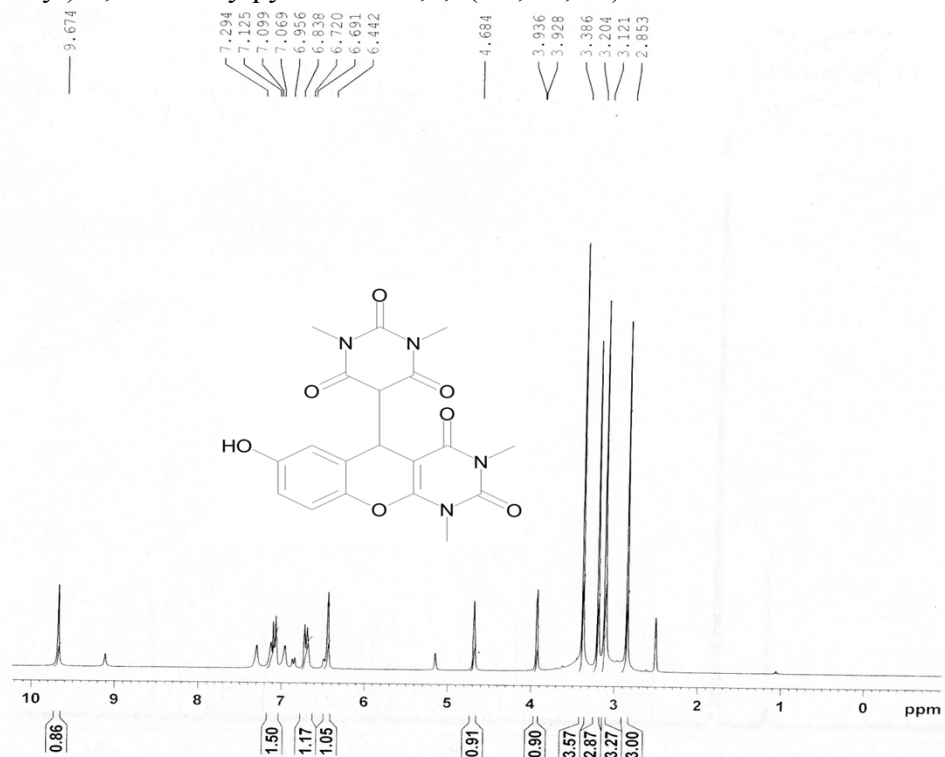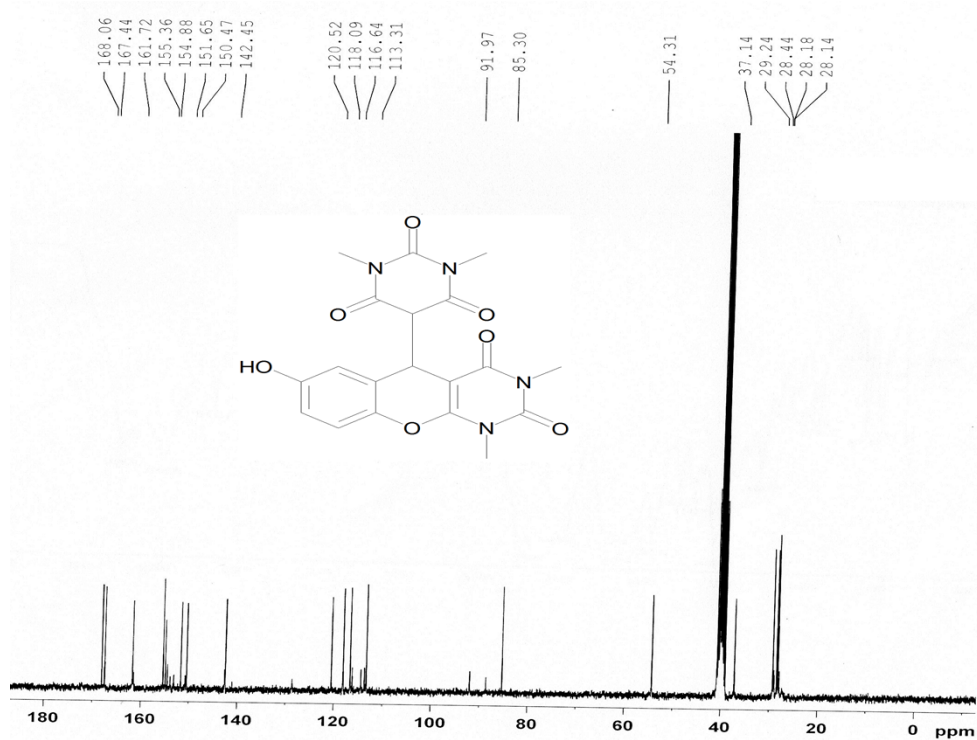

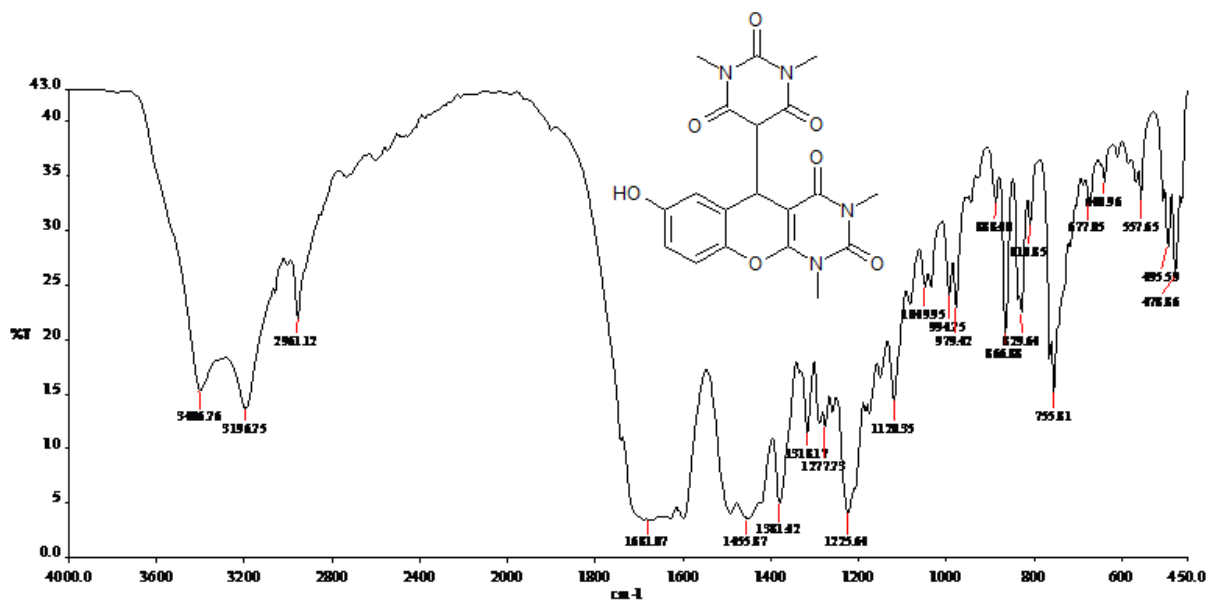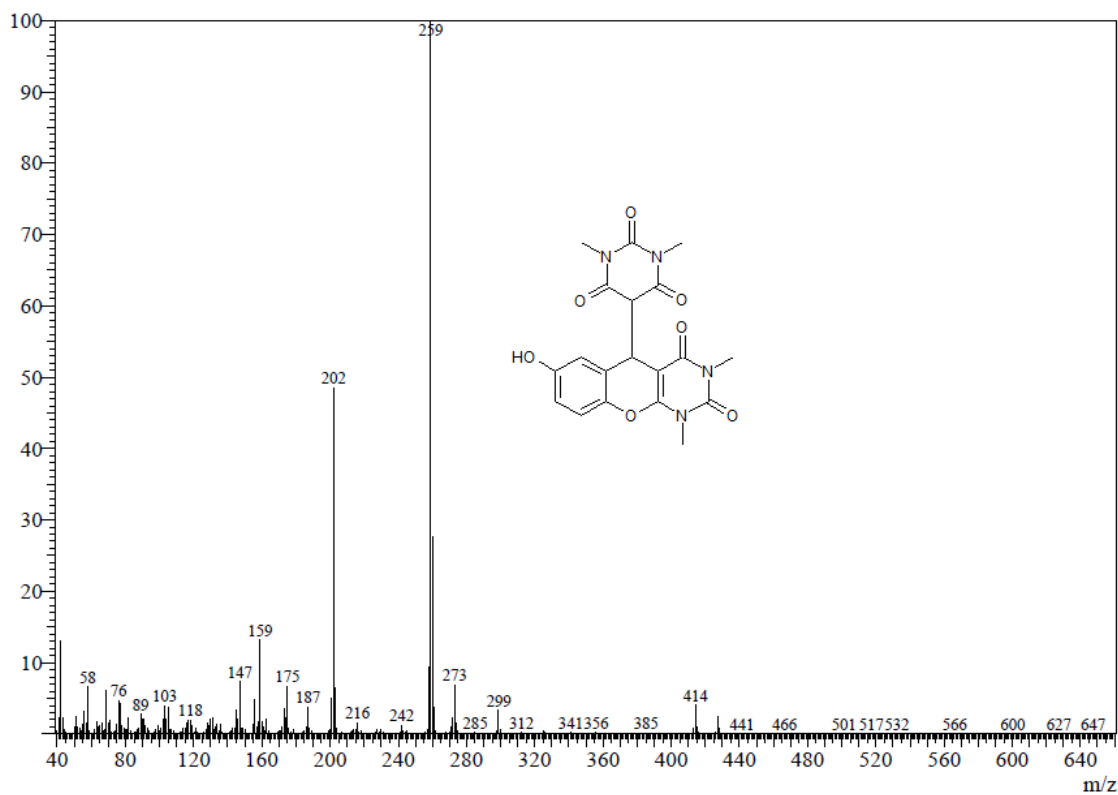

**Entry e, Table 4:** 5-(6-amino-1,3-dimethyl-2,4-dioxo-1,2,3,4-tetrahydropyrimidin-5-yl)-1,3-dimethyl-7-nitro-1,5-dihydro-2H-chromeno[2,3-d]pyrimidine-2,4(3H)-dione

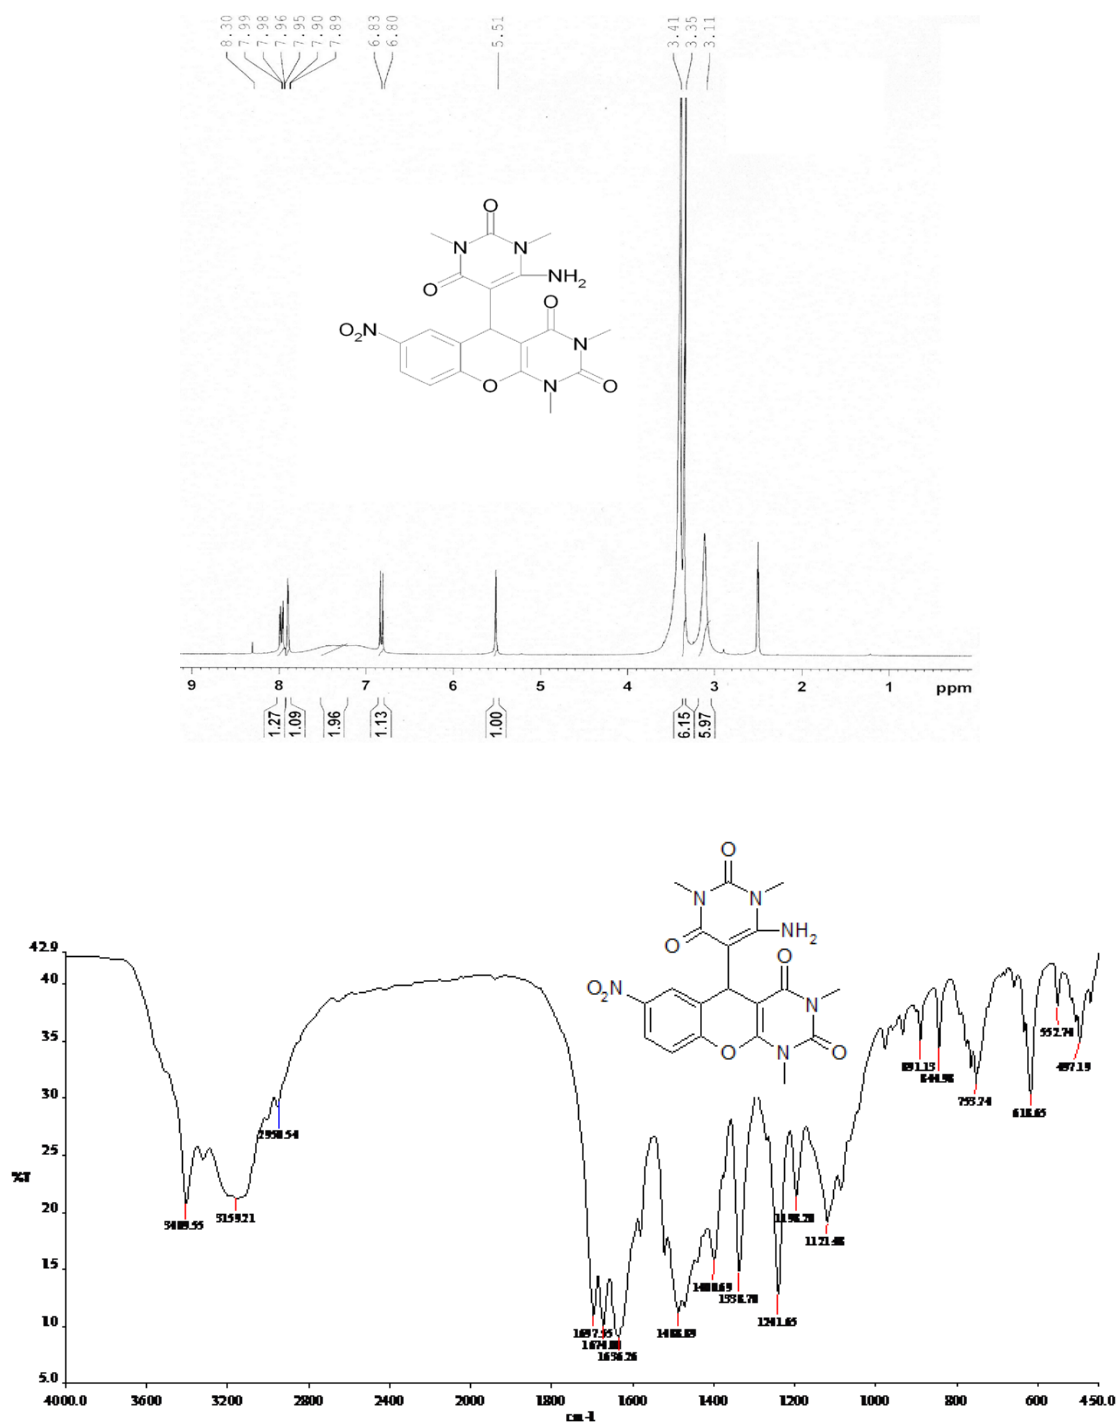



**Entry f, Table 4:** 5-(6-amino-1,3-dimethyl-2,4-dioxo-1,2,3,4-tetrahydropyrimidin-5-yl)-7,9-dichloro-1,3-dimethyl-1,5-dihydro-2H-chromeno[2,3-d]pyrimidine-2,4(3H)-dione

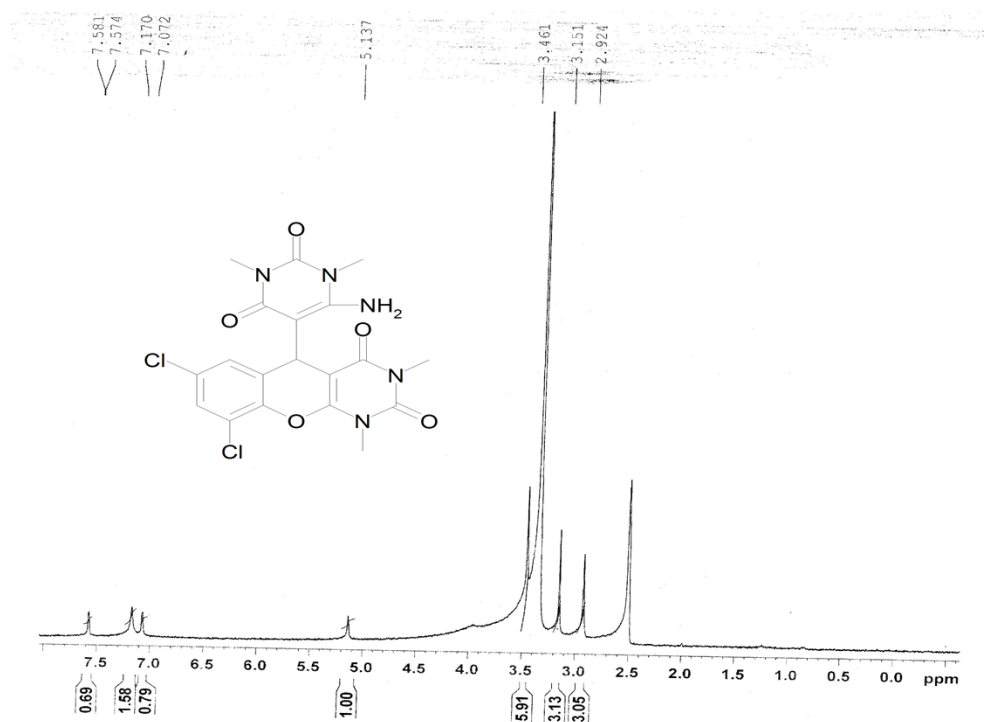



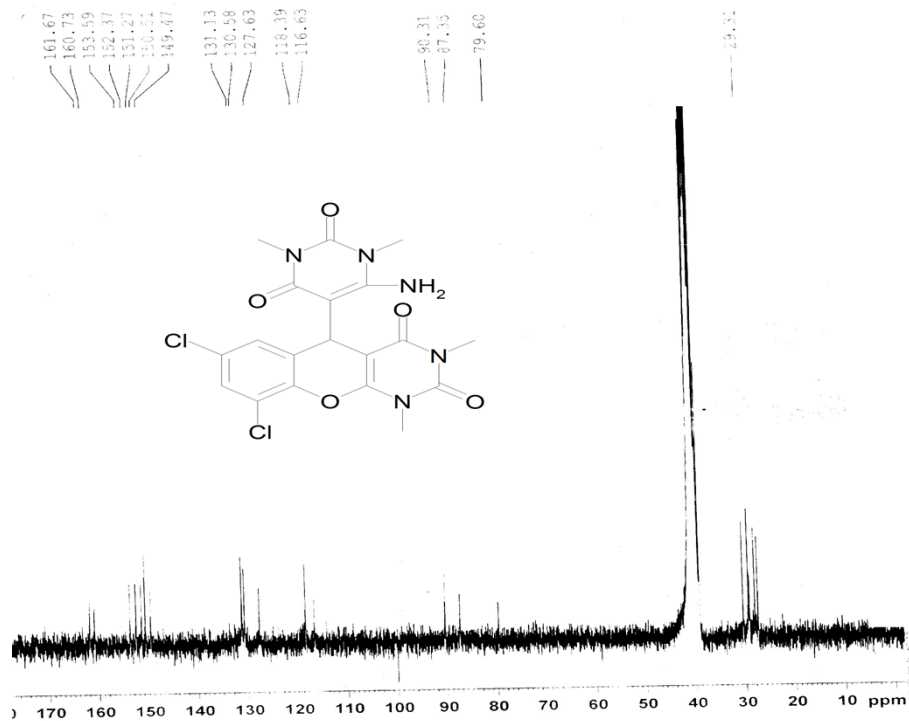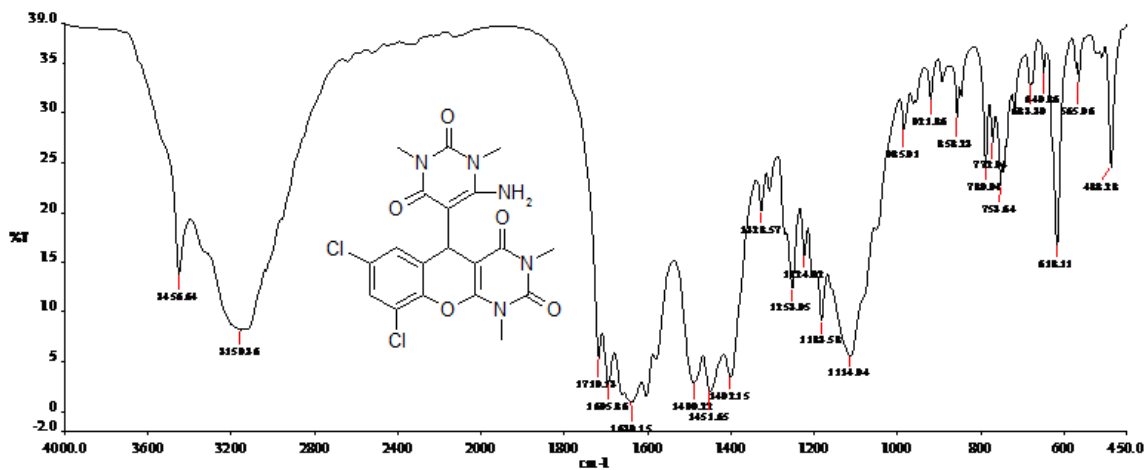

Supplement: c4ra10410b1.pdf [file c4ra10410b1.pdf]
